1 **Diabetes and Incidence of Breast Cancer and its Molecular Subtypes: A**  
2 **Systematic Review and Meta-Analysis**

3 **Short title:** *Diabetes and breast cancer risk*

4  
5 Fanxiu Xiong<sup>1</sup>, Qichen Dai<sup>2</sup>, Sihan Zhang<sup>3</sup>, Stephen Bent<sup>1,4</sup>, Peggy Tahir<sup>5</sup>, Erin L. Van  
6 Blarigan<sup>1,6</sup>, Stacey A. Kenfield<sup>1,6</sup>, June M. Chan<sup>1,6</sup>, Gabriela Schmajuk<sup>7</sup>, Rebecca E.  
7 Graff<sup>1,a</sup>

8  
9 <sup>1</sup> Department of Epidemiology and Biostatistics, University of California, San Francisco,  
10 San Francisco, CA, USA

11 <sup>2</sup> Department of Breast Surgery, National Cancer Center/Cancer Hospital, Chinese  
12 Academy of Medical Sciences and Peking Union Medical College, Beijing, China.

13 <sup>3</sup> Department of Urology, Tongji Hospital, Tongji Medical College, Huazhong University  
14 of Science and Technology, Wuhan, China.

15 <sup>4</sup>Department of Psychiatry, University of California, San Francisco, San Francisco, CA,  
16 USA.

17 <sup>5</sup>UCSF Library, University of California, San Francisco, San Francisco, CA, USA

18 <sup>6</sup>Department of Urology, University of California, San Francisco, San Francisco, CA,  
19 USA.

20 <sup>7</sup>Division of Rheumatology, Department of Medicine, University of California, San  
21 Francisco, San Francisco, CA, USA.

22

23 <sup>a</sup> Corresponding Author:

24 Rebecca E Graff, ScD

25 Department of Epidemiology and Biostatistics

26 University of California, San Francisco, School of Medicine

27 San Francisco, CA 94143

28 E-mail: [Rebecca.Graff@ucsf.edu](mailto:Rebecca.Graff@ucsf.edu)

29

30 **ACKNOWLEDGEMENTS**

31 We gratefully acknowledge Dr. Chiung-Yu Huang and Dr. Thomas Newman for their  
32 critical feedback.

33

34 **FUNDING**

35 JMC receives funding from the Cancer League Foundation. REG is supported by a  
36 Young Investigator Award from the Prostate Cancer Foundation.

37

38 **COMPETING INTERESTS**

39 JMC declares that her husband is a full-time employee of Adela, Inc. and a prior  
40 employee of GRAIL (within the past three years).

41

42 **AUTHOR CONTRIBUTIONS**

43 FX, GS, and REG conceived and designed the study. FX, SB, PT, GS, and REG  
44 developed the methods. FX, QD, SZ reviewed and extracted the data and performed  
45 the quality rating of studies. FX, SB, ELV, SAK, JMC, and REG interpreted the results.  
46 FX and REG wrote the initial draft of the manuscript. GS and REG supervised this  
47 study. All authors revised it for critically important content and read and gave approval  
48 of the final version.

49

50 **WORD COUNTS**

- 51 1) Abstract: 303  
52 2) Main text (excluding references and legends): 3559

53

54 **TOTAL NUMBER OF EACH**

- 55 1) References: 47 for main text and 72 for tables  
56 2) Tables: 2  
57 3) Figures: 3

58 **Abstract**

59 Diabetes mellitus (DM) has been proposed to be positively associated with breast  
60 cancer (BCa) risk due to shared risk factors, metabolic dysfunction, and use of  
61 antidiabetic medications. We conducted a systematic review and meta-analysis to  
62 evaluate the association between DM and BCa risk. We searched PubMed, Embase,  
63 and Web of Science for cohort and case-control studies assessing the association  
64 between DM and BCa published before December 10, 2021. Two reviewers  
65 independently screened the studies for inclusion, abstracted article data, and rated  
66 study quality. Random effects models were used to estimate summary risk ratios (RRs)  
67 and 95% confidence intervals (CIs). From 8396 articles identified in the initial search, 70  
68 independent studies were included in the meta-analysis. DM was associated with an  
69 overall increased risk of BCa (RR=1.20, 95% CI: 1.11-1.29). The 24 case-control  
70 studies demonstrated a stronger association (RR=1.26, 95% CI: 1.13-1.40) than the 46  
71 cohort studies (RR=1.15, 95% CI: 1.05-1.27). Studies reporting risk by menopausal  
72 status found that postmenopausal women had an elevated risk of developing BCa  
73 (RR=1.12, 95% CI: 1.07-1.17). No association between DM and BCa risk was observed  
74 among premenopausal women (RR=0.95, 95% CI: 0.85-1.05). In addition, DM was  
75 associated with significantly increased risks of estrogen receptor (ER)+ (RR=1.09, 95%  
76 CI: 1.00-1.20), ER- (RR=1.16, 95% CI: 1.04-1.30), and triple negative BCa (RR=1.41,  
77 95% CI: 1.01-1.96). The association estimate for human epidermal growth factor 2-  
78 positive BCa was also positive (RR=1.21, 95% CI: 0.52-2.82), but the confidence  
79 interval was wide and crossed the null. Our meta-analysis confirms a modest positive  
80 association between DM and BCa risk. In addition, our results suggest that the DM and

81 BCa association may be modified by menopausal status, and DM may be differentially  
82 associated with BCa subtypes defined by receptor status. Additional studies are  
83 warranted to investigate the mechanisms underlying these associations and any  
84 influence of DM on BCa receptor expression.

85 **KEYWORDS:** Diabetes; breast cancer; molecular subtypes; menopausal status; body  
86 mass index

87 **1 INTRODUCTION**

88 Among women worldwide, breast cancer (BCa) is the most prevalent malignancy and  
89 the leading cause of cancer-related death[1]. In 2020, there were an estimated 2.3  
90 million new cases of female BCa and more than half a million deaths from disease[2].  
91 Obesity is an established risk factor for BCa, particularly in postmenopausal women[3].  
92 Given the relationship between obesity and BCa, it stands to reason that varying  
93 metabolic abnormalities could be associated with BCa risk. Diabetes mellitus (DM) is  
94 one of the most common metabolic abnormalities globally, such that 463 million people  
95 were living with DM in 2019[4]. DM and its complications increase the risk of  
96 cardiovascular disease, neuropathy, retinopathy, kidney failure, and overall mortality[5],  
97 but its relationship with BCa has not been firmly established.

98 Due to shared risk factors, metabolic dysfunction in diabetic patients, and  
99 antidiabetic medication use, it has been proposed that DM could be positively  
100 associated with subsequent BCa risk[6]. Indeed, the potential role of DM in BCa  
101 incidence has been widely investigated. The largest existing meta-analysis, which was  
102 published in 2012 and included 40 observational studies, indicated a 20% excess risk of  
103 BCa among women with DM[7]. Heterogeneity among studies included in this meta-  
104 analysis was substantial, and studies published since have yielded inconsistent  
105 findings. In addition, studies investigating associations between DM and specific BCa  
106 molecular subtypes have been inconclusive. Given that BCa is a heterogeneous  
107 disease – often grouped according to joint expression of hormonal and growth  
108 receptors, including estrogen receptor (ER), progesterone receptor (PR), and human

109 epidermal growth factor receptor 2 (HER2)[8] – it is important to consider possible  
110 distinctions in metabolic etiology.

111 A solidified understanding of the relationship between DM and the risk of BCa  
112 and its subtypes is important for clarifying BCa etiology and informing screening  
113 decisions. Therefore, we reviewed and synthesized the findings from relevant  
114 epidemiologic studies to achieve summary estimates for associations between DM and  
115 risk of BCa overall and of BCa defined by receptor expression.

## 116 **2 MATERIALS AND METHODS**

### 117 **2.1 Research question**

118 Toward the formulation of a coherent research question, we implemented the  
119 Population, Interventions or Exposure, Comparator, Outcome, Study Design (PICOS)  
120 approach, as suggested by PRISMA guidelines.

121

#### 122 *Population*

123 Women aged 18 years or older.

124

#### 125 *Exposure*

126 DM identified prior to any detection of BCa. Gestational DM, which only occurs during  
127 pregnancy, was not included.

128

#### 129 *Comparison*

130 Lacking a diagnosis of DM prior to any detection of BCa.

131

132 *Outcome*

133 Malignant BCa, identified by self-report or from medical records.

134

135 *Study Design*

136 For our primary analyses, cohort and case-control studies were included. To assess  
137 associations between DM and BCa molecular subtypes, all other study designs were  
138 considered.

## 139 **2.2 Literature search**

140 This systematic review and meta-analysis was conducted according to the Preferred  
141 Reporting Item for Systematic Reviews and Meta-analysis 2020 (PRISMA 2020)  
142 statement[9]. The protocol was registered in the International Prospective Register of  
143 Systematic Reviews (PROSPERO CRD42022311936).

144 We conducted a comprehensive database search regarding DM and BCa risk in  
145 PubMed (National Library of Medicine), Embase (Elsevier), and Web of Science  
146 (Clarivate Analytics). We focused on three main concepts: diabetes, BCa, and  
147 associated risks and incidence. Appropriate synonyms were developed for each  
148 concept, and we used both keywords and index terms (e.g., Mesh, Emtree) appropriate  
149 to each database. Full search strategies are included in the Search Appendix. Human  
150 studies that were published by Dec 10, 2021 and written in English were included. We  
151 also reviewed the reference section of studies included in previously published  
152 systematic reviews regarding DM and BCa to identify additional studies that met the  
153 eligibility criteria[7,10–14].

154 **2.3 Study selection**

155 Titles and abstracts were independently screened by two reviewers (FX and QD) to  
156 identify potentially relevant epidemiologic studies. Full texts of potentially relevant  
157 articles were retrieved and reviewed according to inclusion (PICOS) and exclusion  
158 criteria (below). Disagreements that were not resolved by discussion between the two  
159 reviewers were adjudicated by a third reviewer (SZ).

160 Studies were excluded if: they did not differentiate between benign and malignant  
161 breast tumors; DM was diagnosed at the same time as or after BCa diagnosis; the  
162 number of BCa cases in cohort studies or DM cases in case-control studies was less  
163 than 10; they were not human studies; they were not written in English; or they were  
164 case reports, review articles, meeting abstracts, or letters. When more than one study  
165 was conducted in the same study population, only the most recent findings were  
166 included.

167 **2.4 Data abstraction and quality assessment**

168 Two reviewers (FX and SZ) independently abstracted data from relevant articles using a  
169 standardized form. Discrepancies were resolved by discussion with a third reviewer  
170 (QD). Abstracted information included: first author, year of publication, study population,  
171 study design, country of study, age range, follow-up length or calendar period, DM  
172 assessment method, DM classification (i.e., any DM, type 1 DM (T1D), and/or type 2  
173 DM (T2D)), BCa assessment method, BCa molecular subtypes, covariates, risk  
174 estimates with corresponding 95% confidence intervals (CIs), and any association  
175 measures within subgroups. Only estimates from fully-adjusted models were abstracted.



176           The Newcastle-Ottawa-Scale (NOS) was employed to evaluate the risk of bias in  
177 selected cohort and case-control studies[15]. Briefly, the NOS consists of eight items  
178 and is categorized into three domains: 1) selection of study population (4 items); 2) level  
179 of comparability between the study groups (1 item); and 3) assessment of exposure for  
180 case-control studies or outcome for cohort studies (3 items). One star could be awarded  
181 for each item, with the exception of a possible two stars for the single comparability  
182 item. Studies with stars of 8-9, 6-7, and 1-5 were deemed high-, medium-, and low-  
183 quality, respectively.

## 184 **2.5 Statistical analysis**

185 If risk ratios (RRs) were not reported in contributing studies, we assumed that other risk  
186 measures, such as odds ratios (ORs) and hazard ratios (HRs), numerically  
187 approximated RRs under the rare disease assumption[16]. When contributing studies  
188 only reported subgroup estimates (e.g., separate estimates for pre- and post-  
189 menopausal women), we calculated summary estimates for these individual studies  
190 before including them in our meta-analysis. To do so, we used fixed effects models  
191 when heterogeneity between subgroups was not significant and random effects models  
192 when heterogeneity was significant ( $P < 0.05$ ).

193           For our meta-analysis, we estimated summary RRs and 95% CIs using random  
194 effects models, to allow for differences in study populations and generate conservative  
195 results. Heterogeneity across studies was assessed using 1) the  $I^2$  statistic, with 0-25%,  
196 25-75%, and >75% representing possibly unimportant, moderate, and substantial  
197 heterogeneity, respectively, and 2) Cochran's Q statistic, with  $P < 0.05$  as the threshold  
198 for statistical significance. Leave-one-out sensitivity analyses were carried out to

199 evaluate the influence of each study on the overall summary estimate. A temporal  
200 cumulative meta-analysis was also performed to show how the overall estimate  
201 changed as each study was added in chronological order. We additionally performed  
202 analyses stratified by study quality (high, medium, or low).

203 Publication bias was graphically assessed using a funnel plot. Duval and  
204 Tweedie's trim-and-fill method was implemented based on the funnel plot to estimate  
205 the influence of potentially missing studies on the summary estimate[17]. Begg's test  
206 and Egger's test were also implemented to assess publication bias.

207 To explore potential sources of heterogeneity, separate analyses were performed  
208 by study design (cohort study or case-control study), study region (Asia, Americas,  
209 Europe, or Australia), year of publication (before or after the largest existing review,  
210 published in 2012)[10], method of DM ascertainment (self-report or medical review),  
211 adjustment for body mass index (BMI; no or yes), and adjustment for parity (no or yes).  
212 Meta-regression analyses stratified by the aforementioned subgroups were then  
213 performed to examine differences.

214 Some studies performed separate analyses in pre- and post-menopausal  
215 women. We used random-effects models to estimate the association of DM with pre-  
216 and post-menopausal BCa separately. If no information regarding menopausal status  
217 was provided, we defined postmenopausal to be age 50 years or older[18]. In addition,  
218 we examined associations between DM and BCa molecular subtypes. The subtypes  
219 were grouped into four categories: ER-positive (ER+; regardless of PR/HER2 status),  
220 ER-negative (ER-; regardless of PR/HER2 status), HER2-positive (HER2+; negative  
221 ER/PR), and triple-negative (TN; negative ER/PR/ HER2)[19].

222 Hypothesis tests were 2-sided (unless otherwise specified) with a significance  
223 threshold of 0.05. Statistical analyses were performed using Comprehensive Meta-  
224 Analysis Version 3 (Biostat, Englewood, NJ 2013) and R Version 4.0.2.

225

## 226 **3 RESULTS**

### 227 **3.1 Literature search**

228 Initial searches of the databases yielded 10,773 publications. Assessment of references  
229 in relevant reviews[7,10–14] yielded an additional 404 publications. After removing  
230 duplicates and article types other than research articles, 3,893 publications remained.  
231 After removing papers on the basis of title (n=3,150) or abstract (n=488) and excluding  
232 reports (n = 23) which were inaccessible online, were conference abstracts with no full  
233 text, or had titles or abstracts that do not correspond to those indexed by the search  
234 databases, the full text of 232 reports that could be retrieved were reviewed. 70 studies  
235 that met eligibility criteria were included in this review and meta-analysis. 2 additional  
236 cross-sectional studies assessing molecular subtypes at the time of BCa diagnosis were  
237 included in the review but not the meta-analysis. Figure 1 shows the PRISMA flowchart  
238 for the study selection process.

### 239 **3.2 Study description and quality assessment**

240 Descriptive data for the selected studies are presented in Table 1. Of the 72 included  
241 studies, 46 were cohort studies, 24 were case-control studies, and the other 2 were  
242 cross-sectional studies evaluating BCa molecular subtypes. 24 studies were conducted  
243 in Asia, 24 were conducted in the Americas, 21 were conducted in Europe, and 3 were

244 conducted in Australia. Population sizes varied substantially, ranging from 110 to  
245 10,827,079 participants. The slim majority of studies assessed DM based on medical  
246 reports (n=39), with some studies adopting a combination of self-report and clinical  
247 identification (n=4). 10 studies differentiated T1D from T2D. With the exception of 5  
248 studies, BCa was identified from clinical or cancer registry records. All studies adjusted  
249 for age, 36 adjusted for BMI, and 24 adjusted for menopausal status. 52 out of 70 rated  
250 studies were deemed medium to high quality, including 34 cohort and 18 case-control  
251 studies. The 2 studies that specifically investigated BCa molecular subtypes were not  
252 rated due to their cross-sectional design.

### 253 **3.3 Meta-analysis results**

254 2 studies were not included in the meta-analysis because they were cross-sectional and  
255 only assessed molecular subtypes at the time of BCa diagnosis. The meta-analysis of  
256 70 studies evaluating the association between DM and BCa risk overall demonstrated a  
257 20% increased risk of BCa among women with DM (RR=1.20, 95% CI: 1.11-1.29;  
258 Figure 2). Heterogeneity among the studies was substantial ( $I^2=97.9\%$ , P-  
259 heterogeneity<0.001). Leave-one-out sensitivity analyses revealed that the findings  
260 from Dankner 2016[20] were especially influential; excluding this study produced the  
261 most attenuated summary estimate (RR=1.14, 95% CI: 1.09-1.19,  $I^2=88.7\%$ , P-  
262 heterogeneity<0.001; Supplementary Figure S1). The temporal cumulative meta-  
263 analysis demonstrated that the summary estimate reached statistical significance in  
264 2001 and remained fairly constant and significant after 2005 (Supplementary Figure S2).  
265 Meta-analysis of the 9 high-quality (RR=1.12, 95% CI: 1.02-1.22,  $I^2=53.0\%$ , P-  
266 heterogeneity=0.03; Table 2) and, separately, 45 medium-quality (RR=1.15, 95% CI:

267 1.05-1.27,  $I^2=98.4%$ ,  $P$ -heterogeneity $<0.001$ ) studies yielded slightly attenuated  
268 summary estimates. The summary RR for the 16 low-quality studies was 1.42 (95% CI:  
269 1.08-1.86,  $I^2=96.6%$ ,  $P$ -heterogeneity $<0.001$ ).

270 Slight publication bias was detected by the funnel plot (Supplementary Figure  
271 S3A) and Begg's test (1-tailed  $P<0.001$ ), but not by Egger's test (1-tailed  $P=0.11$ ).  
272 When using trim and fill analysis to measure publication bias, no studies were  
273 hypothetically missing, and the summary estimate was therefore unchanged.

274 The results for subgroup analyses are presented in Table 2. The association  
275 estimate summarizing the 46 cohort studies remained statistically significant (RR=1.15,  
276 95% CI: 1.05-1.27), despite 28 studies having reported null findings. The heterogeneity  
277 among cohort studies was still considerable ( $I^2=98.6%$ ,  $P$ -heterogeneity  $<0.001$ ), but no  
278 publication bias was found by the funnel plot or Egger's test (1-tailed  $P=0.11$ ). Begg's  
279 test did indicate heterogeneity (1-tailed  $P <0.001$ ) (Supplementary Figure S3B). Meta-  
280 analysis of the 7 cohort studies of high quality showed more homogeneous results  
281 ( $I^2=23.1%$ ,  $P$ -heterogeneity=0.25), with only one study demonstrating a significant  
282 association. The summary estimate was not statistically significant (RR=1.06, 95% CI:  
283 0.99-1.14).

284 The 24 case-control studies showed a significantly increased BCa risk among  
285 women with DM (RR=1.26, 95% CI: 1.13-1.40), though 14 studies found no association.  
286 Case-control studies demonstrated less heterogeneity than cohort studies ( $I^2=73.1%$ ,  $P$ -  
287 heterogeneity $<0.001$ ). However, the funnel plot demonstrated significant asymmetry,  
288 wherein nearly all small studies with less than average estimates were missing  
289 (Supplementary Figure S3C). After imputing 9 hypothetically missing association

290 estimates to the bottom left of the funnel plot, the summary estimate decreased  
291 remarkably and was no longer statistically significant (RR=1.05, 95% CI: 0.93-1.19).  
292 The 2 case-control studies that were deemed high quality reported ORs of 1.40 (95% CI:  
293 1.00-1.96) and 1.70 (95% CI: 1.15-2.54), respectively. The pooled estimate from 19  
294 medium- to high-quality case-control studies was 1.17 (95% CI: 1.07-1.29,  $I^2=59.8%$ , P-  
295 heterogeneity<0.001).

296         Among regions, the largest association estimate between DM and BCa risk was  
297 found in Asia (RR=1.34, 95% CI: 1.11-1.63,  $I^2=99.1%$ , P-heterogeneity<0.001, n=23),  
298 followed by Europe (RR=1.13, 95% CI: 1.06-1.21,  $I^2=83.4%$ , P-heterogeneity<0.001,  
299 n=21), and the Americas (RR=1.10, 95% CI: 1.03-1.17,  $I^2=40.8%$ , P-heterogeneity=0.02,  
300 n=23). The 3 Australian studies showed homogeneous findings, and though the  
301 summary association estimate was comparable to that for European studies, the  
302 combined results were not statistically significant (RR=1.15, 95% CI: 0.99-1.33,  
303  $I^2=32.0%$ , P-heterogeneity=0.23). Estimates for studies published before 2012  
304 (RR=1.18, 95% CI: 1.09-1.26,  $I^2=77.6%$ , P-heterogeneity<0.001, n=28) versus in/after  
305 2012 (RR=1.20, 95% CI: 1.08-1.33,  $I^2=98.7%$ , P-heterogeneity<0.001, n=42) were  
306 essentially comparable. Methods of DM identification did not materially influence  
307 association estimates (self-report RR=1.18, 95% CI: 1.09-1.29,  $I^2=62.0%$ , P-  
308 heterogeneity<0.001, n=30 versus medical records RR=1.14, 95% CI: 1.03-1.26,  
309  $I^2=98.9%$ , P-heterogeneity<0.001, n=37). Studies that did not adjust for BMI yielded an  
310 equivalent summary estimate (RR=1.21, 95% CI: 1.08-1.35,  $I^2=98.9%$ , P-  
311 heterogeneity<0.001, n=31) to studies controlling for BMI (RR=1.19, 95% CI: 1.06-1.32,  
312  $I^2=89.7%$ , P-heterogeneity<0.001, n=39). 56 studies not accounting for parity yielded a

313 summary estimate of 1.15 (95% CI: 1.06-1.26,  $I^2=98.3\%$ , P-heterogeneity<0.001), while  
314 the summary estimate of the remaining 14 studies was 1.39 (95% CI: 1.18-1.62,  
315  $I^2=79.7\%$ , P-heterogeneity<0.001). The meta-regressions did not suggest heterogeneity  
316 across any subgroups.

317 31 studies, including 11 cohort studies, measured BCa risk in postmenopausal  
318 women, for whom the summary RR was 1.12 (95% CI: 1.07-1.17,  $I^2=65.5\%$ , P-  
319 heterogeneity<0.001). 15 studies reported estimates in premenopausal women, and  
320 none of them found significant associations. We also did not observe an overall  
321 association for premenopausal BCa, and the between-study heterogeneity was  
322 negligible (RR=0.95, 95% CI: 0.85-1.05,  $I^2=0.00\%$ , P-heterogeneity=0.78).

323 13 studies (including the two cross-sectional studies that were not included in the  
324 other meta-analyses) evaluated associations with BCa molecular subtypes. All of them  
325 presented results for ER+ BCa, and the summary RR was 1.09 (95% CI: 1.00-1.20,  
326  $I^2=52.4\%$ , P-heterogeneity=0.01; Figure 3A). Analysis based on 11 studies showed an  
327 increased risk of ER- BCa associated with DM (RR=1.16, 95% CI: 1.04-1.30,  $I^2=0.00\%$ ,  
328 P-heterogeneity=0.57; Figure 3B). The summary estimate for 3 studies that reported  
329 data for HER2+ BCa did not reveal a statistically significant association, and the  
330 confidence interval was especially wide (RR=1.21, 95% CI: 0.52-2.82,  $I^2=67.5\%$ , P-  
331 heterogeneity=0.05; Figure 3C). The 5 studies that assessed the risk of TN BCa  
332 showed a significantly elevated risk related to DM (RR=1.41, 95% CI: 1.01-1.96,  
333  $I^2=49.7\%$ , P-heterogeneity=0.09; Figure 3D).

334

#### 335 4 DISCUSSION

336 In this review of evidence regarding a possible association between DM and BCa risk,  
337 we observed a positive relationship in many studies, even while more than half of  
338 studies reported null results. In the overall meta-analysis including 70 cohort and case-  
339 control studies, we identified a 20% higher risk of BCa in women with DM. The  
340 association was more modest but still statistically significant when restricting to high-  
341 quality studies.

342 Our findings of increased BCa risk in women with DM align with conclusions from  
343 previous reviews[7,10–14]. Wolf et al. (2005) was the first to summarize the  
344 association[11]. Their findings based on 6 cohort and 4 case-control studies suggested  
345 that T2D, but not T1D, may be associated with 10-20% excess risk of BCa. The reviews  
346 and meta-analyses that have been published since have reported similar summary  
347 estimates[7,10,12–14]. The largest review, which included 40 observational studies,  
348 was conducted by Hardefeldt et al. in 2012. It demonstrated a 20% increased risk of  
349 BCa associated with DM[7]. In contrast to our primary analyses, Hardefeldt et al.  
350 included cross-sectional studies and gestational DM. We largely focused on cohort and  
351 case-control studies in an effort to consider temporality. We did not evaluate gestational  
352 DM because its pathogenesis differs from that of other DM, which could render its  
353 impact on breast tumorigenesis distinct. A recent meta-analysis assessed the  
354 relationship of gestational DM with BCa risk with null results[21,22].

355 Several biological mechanisms for BCa initiation in diabetic patients have been  
356 postulated. DM is characterized by hyperglycemia and hyperinsulinemia. Regarding the  
357 former, excessive glucose could favor the selection of malignant cell clones[23] and/or  
358 induce DNA damage, downregulate the expression of antioxidants[24], and increase the



359 generation of reactive oxygen species[25,26]. Regarding the latter, increased insulin  
360 levels resulting from resistance to endogenous insulin or insulin treatment could directly  
361 promote BCa cell proliferation and inhibit cell apoptosis or indirectly mediate growth-  
362 promoting actions by increasing hepatic insulin-like growth factor-1 (IGF-1)  
363 production<sup>17–19</sup>. The mechanical pathways of fat-induced inflammatory cytokines and  
364 altered levels of sex hormone and sex hormone-binding globulin may also play a  
365 role[27,28]. Preclinical data suggest that use of the first-line antidiabetic therapy  
366 metformin could be beneficial for BCa prevention because it directly suppresses cell  
367 proliferation through the activation of AMPK and regulation of the mTOR signaling  
368 pathway or indirectly improves hyperglycemia, hyperinsulinemia, and inflammation[29–  
369 31]. However, epidemiologic evidence regarding the relationship between metformin  
370 and BCa prevention has been inconsistent[32].

371         Despite the overall positive association between DM and BCa that we identified,  
372 heterogeneity across studies was substantial. Population composition, study design,  
373 study region, and covariate adjustment all impacted the findings. In particular, our meta-  
374 analysis of cohort studies yielded a more modest summary estimate than our meta-  
375 analysis of case-control studies. Publication bias, however, may not have been  
376 negligible among case-control studies, and imputation of potentially missing estimates  
377 from individual studies yielded a summary estimate that was attenuated and non-  
378 significant.

379         We observed a 34% increased risk of BCa in women with DM in studies  
380 conducted in Asia, whereas studies conducted in Western populations demonstrated  
381 smaller associations. We note that heterogeneity was highest in the meta-analysis of

382 studies conducted in Asia. To explore heterogeneity among such studies, we ran a  
383 *posteriori* meta-regression analyses that demonstrated a significant difference between  
384 studies that did versus did not adjust for BMI. 13 studies that did not adjust for BMI  
385 indicated a significant 53% increased risk of BCa among women with DM, while 10  
386 studies that did adjust for BMI did not yield a significant summary association.

387         Though adjustment for BMI was consequential for studies in Asia, BMI-adjusted  
388 studies overall had a comparable summary estimate to studies that did not adjust for  
389 BMI. These results suggest that DM may be a risk factor for BCa independent of obesity.  
390 Nonetheless, obesity and DM might trigger similar pathogenic mechanisms of BCa  
391 development, including metabolic changes, inflammation, insulin resistance and  
392 increased IGF-1, and altered antitumor immunity[33]. Parity, and particularly multiple  
393 pregnancies, has been linked with an increased risk of T2DM but is associated with a  
394 lower risk of BCa[34,35]. Ignoring parity when evaluating the relationship between T2M  
395 and BCa could result in underestimations of the true association. Indeed, we found that  
396 studies that adjusted for parity yielded slightly stronger association estimates.

397         BCa is a heterogeneous disease with varied molecular features, but the  
398 association between DM and BCa molecular subtypes is uncertain. Biological evidence  
399 suggests that hyperinsulinemia could induce expression and increase the binding ability  
400 of ER[36]. By contrast, metformin may repress the expression of ER and ER target  
401 genes[37]. DM-induced changes in levels of bioavailable sex hormones, such as  
402 increasing levels of estrogen and androgen and decreasing levels of progesterone[36],  
403 could also impact receptor expression. One meta-analysis found non-significant  
404 associations between DM and ER, PR, and HER2 status, respectively, by comparing

405 hormone receptor negativity to their positive counterparts[38]. In our review, we found  
406 that DM was most strongly associated with TN BCa, which is among the most  
407 aggressive types of disease.

408 We were not able to combine findings regarding associations between DM  
409 duration and BCa risk since studies had different DM duration categories. However,  
410 multiple, though not all, studies that assessed the temporal trend of the association  
411 between DM and BCa indicated that the relationship was strongest during the time  
412 period closely following DM diagnosis[39–45]. It is possible that women with newly  
413 diagnosed DM have more frequent contact with health care providers and are thus more  
414 likely to uncover BCa. Neglecting this detection bias may lead to overestimation of BCa  
415 risk at the time of DM diagnosis[46]. However, screening bias is unlikely to account for  
416 the excess risk of BCa observed up to 10 years following DM diagnosis[42,45,47,48],  
417 suggesting that DM may play a real etiologic role in BCa development.

418 Our review expands upon findings from previous reviews in several important  
419 ways. First, we assessed the risk of bias for each study. As such, we were able to  
420 combine findings from only high-quality studies, which were least likely to be affected by  
421 selection bias, confounding, and reverse causation. Second, we identified and adjusted  
422 for potential missingness of case-control studies with small sample sizes and non-  
423 significant results. Third, our study summarized existing evidence addressing possible  
424 associations between DM and molecular subtypes of BCa. Nevertheless, there are  
425 some limitations of this review worth noting. Many of the contributing studies were  
426 susceptible to selection bias, most often related to restriction to older ages, so as to  
427 maximize the number of DM and/or BCa cases. In addition, most studies were unable to

428 differentiate between T1D and T2D. Because T1D and T2D may differ in etiology,  
429 patient demographics, and treatment regimens, the pathogenesis of BCa could be  
430 different in these two patient groups. It is reasonable to assume that the results of this  
431 review largely concern T2D given that more than 95% of DM cases are estimated to be  
432 T2D[49], and in many studies, the median/mean age at DM diagnosis was above 40  
433 years. Finally, most included studies did not report information on DM therapy, which  
434 could mediate any relationship between DM and BCa risk.

435         In conclusion, this updated systematic review and meta-analysis confirms prior  
436 findings of an increased risk of BCa in women with DM. In addition, our results suggest  
437 that women with DM may have a higher risk of diagnosis with an aggressive molecular  
438 subtype of BCa compared to women without DM. Further high-quality evidence is  
439 needed to verify the relationship between DM and BCa receptor expression, understand  
440 the underlying mechanisms of breast carcinogenesis in women with DM, and eventually  
441 provide evidence-based recommendations for BCa prevention and treatment.

442 **REFERENCES**

- 443 1. Breast cancer [Internet]. [cited 2022 May 23]. Available from:  
444 <https://www.who.int/news-room/fact-sheets/detail/breast-cancer>
- 445 2. Sung H, Ferlay J, Siegel RL, Laversanne M, Soerjomataram I, Jemal A, et al. Global  
446 Cancer Statistics 2020: GLOBOCAN Estimates of Incidence and Mortality Worldwide for  
447 36 Cancers in 185 Countries. *CA Cancer J Clin.* 2021;71:209–49.
- 448 3. García-Estévez L, Cortés J, Pérez S, Calvo I, Gallegos I, Moreno-Bueno G. Obesity  
449 and Breast Cancer: A Paradoxical and Controversial Relationship Influenced by  
450 Menopausal Status. *Front Oncol* [Internet]. 2021 [cited 2022 May 23];11. Available from:  
451 <https://www.frontiersin.org/article/10.3389/fonc.2021.705911>
- 452 4. Cuadros DF, Li J, Musuka G, Awad SF. Spatial epidemiology of diabetes: Methods  
453 and insights. *World J Diabetes.* Pleasanton: Baishideng Publishing Group Inc;  
454 2021;12:1042–56.
- 455 5. Diabetes [Internet]. [cited 2022 Feb 17]. Available from: [https://www.who.int/news-](https://www.who.int/news-room/fact-sheets/detail/diabetes)  
456 [room/fact-sheets/detail/diabetes](https://www.who.int/news-room/fact-sheets/detail/diabetes)
- 457 6. Giovannucci E, Harlan DM, Archer MC, Bergenstal RM, Gapstur SM, Habel LA, et al.  
458 Diabetes and Cancer: A Consensus Report. *CA Cancer J Clin.* 2010;60:207–21.
- 459 7. Hardefeldt PJ, Edirimanne S, Eslick GD. Diabetes increases the risk of breast cancer:  
460 a meta-analysis. *Endocr Relat Cancer.* 2012;19:793–803.
- 461 8. Dai X, Xiang L, Li T, Bai Z. Cancer Hallmarks, Biomarkers and Breast Cancer  
462 Molecular Subtypes. *J Cancer.* 2016;7:1281–94.
- 463 9. Page MJ, McKenzie JE, Bossuyt PM, Boutron I, Hoffmann TC, Mulrow CD, et al. The  
464 PRISMA 2020 statement: an updated guideline for reporting systematic reviews. *BMJ.*  
465 2021;n71.
- 466 10. Boyle P, Boniol M, Koechlin A, Robertson C, Valentini F, Coppens K, et al. Diabetes  
467 and breast cancer risk: a meta-analysis. *Br J Cancer.* 2012;107:1608–17.
- 468 11. Wolf I, Sadetzki S, Catane R, Karasik A, Kaufman B. Diabetes mellitus and breast  
469 cancer. :9.
- 470 12. Larsson SC, Mantzoros CS, Wolk A. Diabetes mellitus and risk of breast cancer: A  
471 meta-analysis. *Int J Cancer.* 2007;121:856–62.
- 472 13. Liao S, Li J, Wei W, Wang L, Zhang Y, Li J, et al. Association between diabetes  
473 mellitus and breast cancer risk: a meta-analysis of the literature. *Asian Pac J Cancer*  
474 *Prev APJCP.* 2011;12:1061–5.

- 475 14. De Bruijn KMJ, Arends LR, Hansen BE, Leeflang S, Ruiter R, van Eijck CHJ.  
476 Systematic review and meta-analysis of the association between diabetes mellitus and  
477 incidence and mortality in breast and colorectal cancer. *Br J Surg*. 2013;100:1421–9.
- 478 15. Stang A. Critical evaluation of the Newcastle-Ottawa scale for the assessment of the  
479 quality of nonrandomized studies in meta-analyses. *Eur J Epidemiol*. 2010;25:603–5.
- 480 16. Symons MJ, Moore DT. Hazard rate ratio and prospective epidemiological studies. *J*  
481 *Clin Epidemiol*. 2002;55:893–9.
- 482 17. Duval S, Tweedie R. Trim and Fill: A Simple Funnel-Plot-Based Method of Testing  
483 and Adjusting for Publication Bias in Meta-Analysis. *Biometrics*. 2000;56:455–63.
- 484 18. Menopause - Symptoms and causes - Mayo Clinic [Internet]. [cited 2022 May 3].  
485 Available from: [https://www.mayoclinic.org/diseases-conditions/menopause/symptoms-](https://www.mayoclinic.org/diseases-conditions/menopause/symptoms-causes/syc-20353397)  
486 [causes/syc-20353397](https://www.mayoclinic.org/diseases-conditions/menopause/symptoms-causes/syc-20353397)
- 487 19. Barańska A, Dolar-Szczasny J, Kanadys W, Kinik W, Ceglarska D, Religioni U, et al.  
488 Oral Contraceptive Use and Breast Cancer Risk According to Molecular Subtypes  
489 Status: A Systematic Review and Meta-Analysis of Case-Control Studies. *Cancers*.  
490 2022;14:574.
- 491 20. Dankner et al. - 2016 - Time-Dependent Risk of Cancer After a Diabetes Dia.pdf.
- 492 21. Sona MF, Myung S-K, Park K, Jargalsaikhan G. Type 1 diabetes mellitus and risk of  
493 cancer: a meta-analysis of observational studies. *Jpn J Clin Oncol*. 2018;48:426–33.
- 494 22. Wang Y, Yan P, Fu T, Yuan J, Yang G, Liu Y, et al. The association between  
495 gestational diabetes mellitus and cancer in women: A systematic review and meta-  
496 analysis of observational studies. *Diabetes Metab*. 2020;46:461–71.
- 497 23. Warburg O. On the Origin of Cancer Cells. *Science*. American Association for the  
498 Advancement of Science; 1956;123:309–14.
- 499 24. Chronic oxidative stress as a mechanism for glucose toxicity of the beta cell in Type  
500 2 diabetes | SpringerLink [Internet]. [cited 2021 Jul 23]. Available from:  
501 <https://link.springer.com/article/10.1007%2Fs12013-007-0026-5>
- 502 25. Collaboration TERF. Diabetes Mellitus, Fasting Glucose, and Risk of Cause-Specific  
503 Death [Internet]. <http://dx.doi.org/10.1056/NEJMoa1008862>. Massachusetts Medical  
504 Society; 2011 [cited 2021 Jul 22]. Available from:  
505 <https://www.nejm.org/doi/10.1056/NEJMoa1008862>
- 506 26. Jee SH. Fasting Serum Glucose Level and Cancer Risk in Korean Men and  
507 Women. *JAMA*. 2005;293:194.
- 508 27. Crave JC, Lejeune H, Brébant C, Baret C, Pugeat M. Differential effects of insulin  
509 and insulin-like growth factor I on the production of plasma steroid-binding globulins by

- 510 human hepatoblastoma-derived (Hep G2) cells. *J Clin Endocrinol Metab.*  
511 1995;80:1283–9.
- 512 28. Ferroni P, Riondino S, Buonomo O, Palmirotta R, Guadagni F, Roselli M. Type 2  
513 Diabetes and Breast Cancer: The Interplay between Impaired Glucose Metabolism and  
514 Oxidant Stress. *Oxid Med Cell Longev.* 2015;2015:183928.
- 515 29. Hatoum D, McGowan EM. Recent advances in the use of metformin: can treating  
516 diabetes prevent breast cancer? *BioMed Res Int.* 2015;2015:548436.
- 517 30. Faria J, Negalha G, Azevedo A, Martel F. Metformin and Breast Cancer: Molecular  
518 Targets. *J Mammary Gland Biol Neoplasia.* 2019;24:111–23.
- 519 31. Rena G, Hardie DG, Pearson ER. The mechanisms of action of metformin.  
520 *Diabetologia.* 2017;60:1577–85.
- 521 32. Tang GH, Satkunam M, Pond GR, Steinberg GR, Blandino G, Schunemann HJ, et  
522 al. Association of Metformin with Breast Cancer Incidence and Mortality in Patients with  
523 Type II Diabetes: A GRADE-Assessed Systematic Review and Meta-analysis. *Cancer*  
524 *Epidemiol Biomarkers Prev.* Philadelphia: Amer Assoc Cancer Research; 2018;27:627–  
525 35.
- 526 33. Picon-Ruiz M, Morata-Tarifa C, Valle-Goffin JJ, Friedman ER, Slingerland JM.  
527 Obesity and adverse breast cancer risk and outcome: Mechanistic insights and  
528 strategies for intervention: Breast Cancer, Inflammation, and Obesity. *CA Cancer J Clin.*  
529 2017;67:378–97.
- 530 34. Li P, Shan Z, Zhou L, Xie M, Bao W, Zhang Y, et al. MECHANISMS IN  
531 ENDOCRINOLOGY: Parity and risk of type 2 diabetes: a systematic review and dose-  
532 response meta-analysis. *Eur J Endocrinol.* Bioscientifica Ltd; 2016;175:R231–45.
- 533 35. Huo D, Adebamowo CA, Ogundiran TO, Akang EE, Campbell O, Adenipekun A, et  
534 al. Parity and breastfeeding are protective against breast cancer in Nigerian women. *Br*  
535 *J Cancer.* Nature Publishing Group; 2008;98:992–6.
- 536 36. Joung KH, Jeong J-W, Ku BJ. The Association between Type 2 Diabetes Mellitus  
537 and Women Cancer: The Epidemiological Evidences and Putative Mechanisms.  
538 *BioMed Res Int.* 2015;2015:920618.
- 539 37. KIM J, LEE J, JANG SY, KIM C, CHOI Y, KIM A. Anticancer effect of metformin on  
540 estrogen receptor-positive and tamoxifen-resistant breast cancer cell lines. *Oncol Rep.*  
541 2016;35:2553–60.
- 542 38. Zhang F, de Haan-Du J, Sidorenkov G, Landman GWD, Jalving M, Zhang Q, et al.  
543 Type 2 Diabetes Mellitus and Clinicopathological Tumor Characteristics in Women  
544 Diagnosed with Breast Cancer: A Systematic Review and Meta-Analysis. *Cancers.*  
545 2021;13:4992.

- 546 39. Dankner R, Boffetta P, Balicer RD, Boker LK, Sadeh M, Berlin A, et al. Time-  
547 Dependent Risk of Cancer After a Diabetes Diagnosis in a Cohort of 2.3 Million Adults.  
548 *Am J Epidemiol.* 2016;183:1098–106.
- 549 40. Harding JL, Shaw JE, Peeters A, Cartensen B, Magliano DJ. Cancer Risk Among  
550 People With Type 1 and Type 2 Diabetes: Disentangling True Associations, Detection  
551 Bias, and Reverse Causation. *Diabetes Care.* 2015;38:264–70.
- 552 41. Hemminki K, Li X, Sundquist J, Sundquist K. Risk of Cancer Following  
553 Hospitalization for Type 2 Diabetes. *The Oncologist.* 2010;15:548–55.
- 554 42. Michels KB, Solomon CG, Hu FB, Rosner BA, Hankinson SE, Colditz GA, et al.  
555 Type 2 Diabetes and Subsequent Incidence of Breast Cancer in the Nurses' Health  
556 Study. *Diabetes Care.* 2003;26:1752–8.
- 557 43. Wang M, Hu R-Y, Wu H-B, Pan J, Gong W-W, Guo L-H, et al. Cancer risk among  
558 patients with type 2 diabetes mellitus: a population-based prospective study in China.  
559 *Sci Rep.* 2015;5:11503.
- 560 44. Attner B, Landin-Olsson M, Lithman T, Noreen D, Olsson H. Cancer among patients  
561 with diabetes, obesity and abnormal blood lipids: a population-based register study in  
562 Sweden. *Cancer Causes Control.* 2012;23:769–77.
- 563 45. Bosetti C, Rosato V, Polesel J, Levi F, Talamini R, Montella M, et al. Diabetes  
564 Mellitus and Cancer Risk in a Network of Case-Control Studies. *Nutr Cancer.*  
565 2012;64:643–51.
- 566 46. Tseng C-H. Diabetes and breast cancer in Taiwanese women: a detection bias? *Eur*  
567 *J Clin Invest.* 2014;44:910–7.
- 568 47. Weiderpass E, Gridley G, Persson I, Nyrén O, Ekblom A, Adami H-O. Risk of  
569 endometrial and breast cancer in patients with diabetes mellitus. *Int J Cancer.*  
570 1997;71:360–3.
- 571 48. Wu AH, Yu MC, Tseng C-C, Stanczyk FZ, Pike MC. Diabetes and risk of breast  
572 cancer in Asian-American women. *Carcinogenesis.* 2007;28:1561–6.
- 573 49. Diabetes [Internet]. [cited 2022 Jul 11]. Available from: [https://www.who.int/news-](https://www.who.int/news-room/fact-sheets/detail/diabetes)  
574 [room/fact-sheets/detail/diabetes](https://www.who.int/news-room/fact-sheets/detail/diabetes)
- 575



576 **FIGURE LEGENDS**

577 FIGURE 1. Flow diagram of study selection.

578 FIGURE 2. Forest plot of the association between diabetes and breast cancer risk.

579 FIGURE 3. Forest plots for the associations of diabetes with (A) estrogen receptor-

580 positive breast cancer, (B) estrogen receptor-negative breast cancer, (C) triple-negative

581 breast cancer, and (D) human epidermal growth factor 2-positive breast cancer.

582

583 **SUPPORTING INFORMATION**

584 SUPPLEMENTARY FIGURE S1. Leave-one-out sensitivity meta-analyses of 70 studies

585 assessing the association between diabetes and breast cancer risk.

586 SUPPLEMENTARY FIGURE S2. Cumulative temporal meta-analysis of 70 studies

587 assessing the association between diabetes and breast cancer risk.

588 SUPPLEMENTARY FIGURE S3. Funnel plots of observed and imputed studies using

589 trim-and-fill method for assessing publication bias among (A) all 70 studies, (B) 46

590 cohort studies, and (C) 24 case-control studies.

Identification of studies via databases, registers and other sources

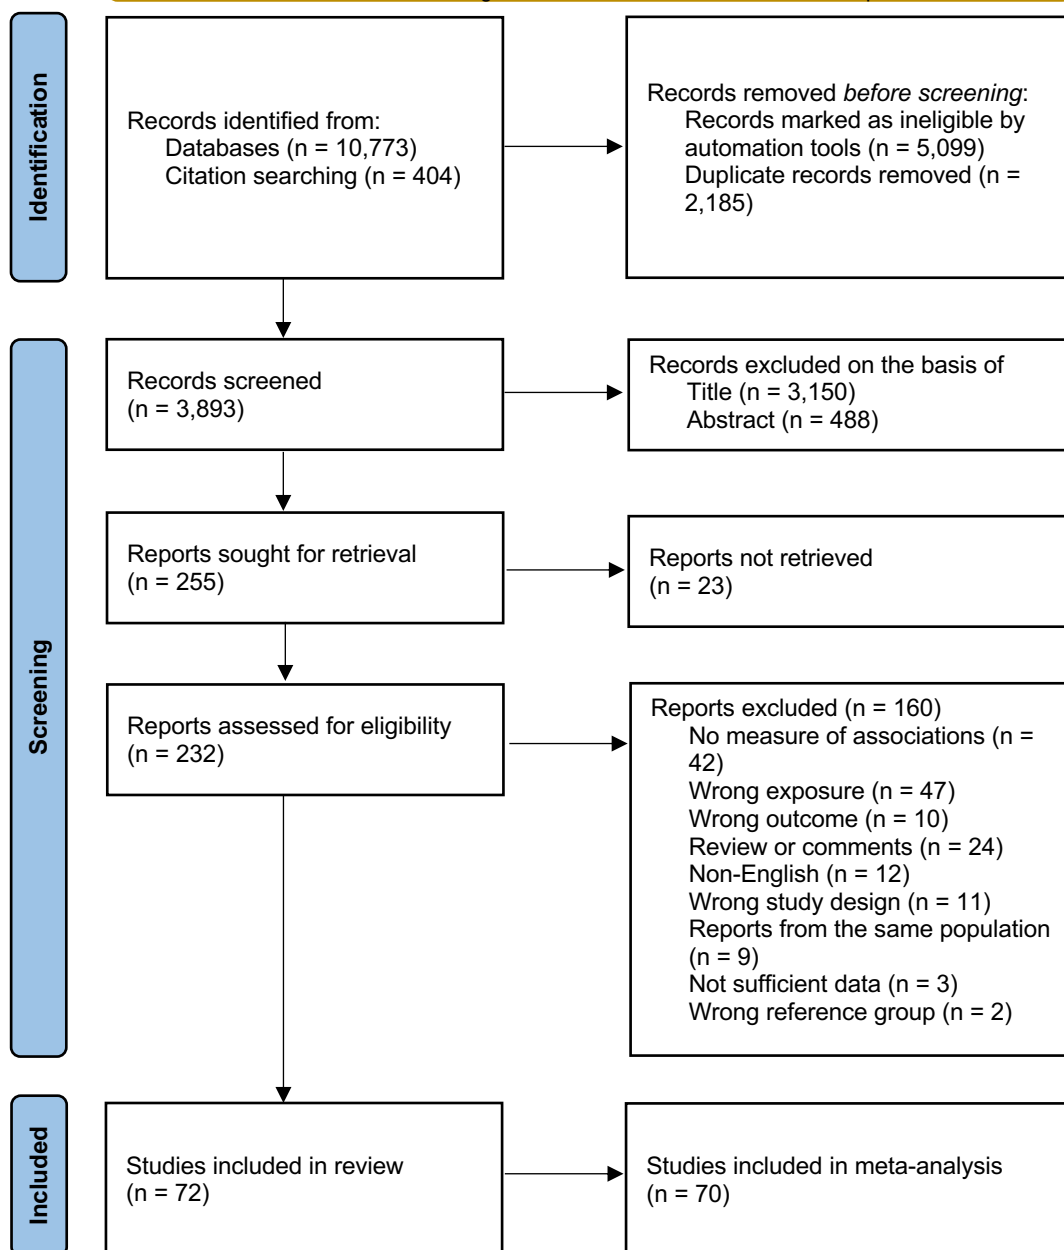

**Study name**

**Statistics for each study**

**Risk ratio and 95% CI**

medRxiv preprint doi: <https://doi.org/10.1101/2023.05.13.23289893>; this version posted May 15, 2023. The copyright holder for this preprint (which was not certified by peer review) is the author/funder, who has granted medRxiv a license to display the preprint in perpetuity. All rights reserved. No reuse allowed without permission.

| Study name            | Risk ratio | Lower limit | Upper limit | p-value | 95% CI |
|-----------------------|------------|-------------|-------------|---------|--------|
| Adami 1991            | 0.896      | 0.766       | 1.048       | -1.375  | 0.169  |
| Attner 2012           | 1.185      | 0.994       | 1.414       | 1.889   | 0.059  |
| Baron 2001            | 1.105      | 0.963       | 1.268       | 1.429   | 0.153  |
| Beji 2007             | 3.456      | 2.076       | 5.752       | 4.769   | 0.000  |
| Bergkvist 1988        | 0.896      | 0.425       | 1.887       | -0.289  | 0.772  |
| Bjornsdottir 2020     | 1.051      | 1.011       | 1.093       | 2.500   | 0.012  |
| Bosetti 2012          | 1.733      | 1.343       | 2.236       | 4.231   | 0.000  |
| Bowker 2011           | 1.000      | 0.907       | 1.103       | 0.000   | 1.000  |
| Bronsveld 2017        | 1.010      | 0.934       | 1.092       | 0.250   | 0.803  |
| Carstensen 2012       | 1.051      | 1.011       | 1.093       | 2.500   | 0.012  |
| Chlebowski 2012       | 0.990      | 0.863       | 1.136       | -0.143  | 0.886  |
| Chodick 2010          | 1.000      | 0.855       | 1.170       | 0.000   | 1.000  |
| Crispo 2017           | 2.460      | 1.393       | 4.342       | 3.103   | 0.002  |
| Dankner 2016          | 1.994      | 1.955       | 2.033       | 69.000  | 0.000  |
| Fang 2018             | 1.127      | 1.002       | 1.268       | 2.000   | 0.046  |
| Garcia-Esquinas 2016  | 1.094      | 0.815       | 1.468       | 0.600   | 0.549  |
| Gini 2016             | 1.139      | 0.993       | 1.306       | 1.857   | 0.063  |
| Gong 2016             | 1.020      | 0.925       | 1.125       | 0.400   | 0.689  |
| Goodman 1997          | 2.054      | 1.259       | 3.353       | 2.880   | 0.004  |
| Harding 2015          | 1.127      | 1.106       | 1.150       | 12.000  | 0.000  |
| He 2018               | 1.284      | 0.885       | 1.863       | 1.316   | 0.188  |
| Hemminki 2010         | 1.363      | 1.286       | 1.446       | 10.333  | 0.000  |
| Hjalgrim 1997         | 0.698      | 0.312       | 1.558       | -0.878  | 0.380  |
| Hsieh 2014            | 0.411      | 0.365       | 0.462       | -14.833 | 0.000  |
| Inoue 2006            | 0.827      | 0.442       | 1.548       | -0.594  | 0.553  |
| Jee 2005              | 1.507      | 1.263       | 1.797       | 4.556   | 0.000  |
| Jung 2013             | 0.970      | 0.830       | 1.135       | -0.375  | 0.708  |
| Khan 2006             | 1.271      | 0.516       | 3.132       | 0.522   | 0.602  |
| Kuriki 2007           | 1.162      | 0.901       | 1.499       | 1.154   | 0.249  |
| Lambe 2011            | 1.150      | 0.964       | 1.372       | 1.556   | 0.120  |
| Lavecchia 1994        | 0.803      | 0.622       | 1.035       | -1.692  | 0.091  |
| Liaw 2015             | 1.127      | 1.106       | 1.150       | 12.000  | 0.000  |
| Magliano 2012         | 0.861      | 0.527       | 1.405       | -0.600  | 0.549  |
| Maskarinec 2017       | 0.951      | 0.571       | 1.583       | -0.192  | 0.848  |
| Maskarinec Ice 2019   | 1.010      | 0.682       | 1.495       | 0.050   | 0.960  |
| Maskarinec Ja 2019    | 1.083      | 1.002       | 1.172       | 2.000   | 0.046  |
| Michels 2003          | 1.174      | 1.023       | 1.346       | 2.286   | 0.022  |
| Mourouti 2013         | 1.363      | 0.502       | 3.705       | 0.608   | 0.543  |
| Nakamura 2013         | 1.150      | 0.467       | 2.834       | 0.304   | 0.761  |
| Ogunleye 2009         | 1.051      | 0.753       | 1.467       | 0.294   | 0.769  |
| Omara 1985            | 1.185      | 0.901       | 1.560       | 1.214   | 0.225  |
| Onitilo 2014          | 1.073      | 0.899       | 1.279       | 0.778   | 0.437  |
| Palmer 2017           | 1.185      | 0.994       | 1.414       | 1.889   | 0.059  |
| Pan 2018              | 1.209      | 0.994       | 1.471       | 1.900   | 0.057  |
| Park 2021             | 0.990      | 0.863       | 1.136       | -0.143  | 0.886  |
| Rapp 2006             | 1.377      | 1.026       | 1.848       | 2.133   | 0.033  |
| Rastad 2019           | 0.932      | 0.539       | 1.614       | -0.250  | 0.803  |
| Redaniel 2012         | 1.116      | 0.973       | 1.280       | 1.571   | 0.116  |
| Reeves 2012           | 1.209      | 0.833       | 1.755       | 1.000   | 0.317  |
| Rennert 2020          | 0.970      | 0.814       | 1.158       | -0.333  | 0.739  |
| Rollison 2008         | 1.062      | 0.856       | 1.317       | 0.545   | 0.585  |
| Ronco post 2012       | 1.632      | 1.000       | 2.664       | 1.960   | 0.050  |
| Ronco pre 2012        | 1.310      | 0.586       | 2.926       | 0.659   | 0.510  |
| Salinas-Martinez 2014 | 2.586      | 1.615       | 4.139       | 3.958   | 0.000  |
| Sanderson 2010        | 1.010      | 0.847       | 1.205       | 0.111   | 0.912  |
| Sanderson 2019        | 0.887      | 0.648       | 1.214       | -0.750  | 0.453  |
| Sellers 2007          | 1.616      | 0.990       | 2.638       | 1.920   | 0.055  |
| Steenland 1995        | 1.405      | 0.708       | 2.790       | 0.971   | 0.331  |
| Tabassum 2016         | 2.974      | 1.358       | 6.514       | 2.725   | 0.006  |
| Talamini 1997         | 1.405      | 1.047       | 1.885       | 2.267   | 0.023  |
| Vatseba 2019          | 3.287      | 2.598       | 4.159       | 9.917   | 0.000  |
| Wang 2013             | 1.994      | 0.763       | 5.209       | 1.408   | 0.159  |
| Wang cc 2015          | 1.010      | 0.916       | 1.114       | 0.200   | 0.841  |
| Wang cs 2015          | 3.490      | 0.957       | 12.725      | 1.894   | 0.058  |
| Weiderpass 1997       | 1.297      | 1.199       | 1.403       | 6.500   | 0.000  |
| Weiss 1999            | 1.127      | 0.691       | 1.840       | 0.480   | 0.631  |
| Wideroff 1997         | 1.105      | 1.063       | 1.149       | 5.000   | 0.000  |
| Wu 2007               | 1.716      | 1.160       | 2.540       | 2.700   | 0.007  |
| Yeh 2012              | 1.073      | 0.608       | 1.893       | 0.241   | 0.809  |
| Zhang 2012            | 2.203      | 1.579       | 3.075       | 4.647   | 0.000  |
|                       | 1.195      | 1.106       | 1.292       | 4.489   | 0.000  |

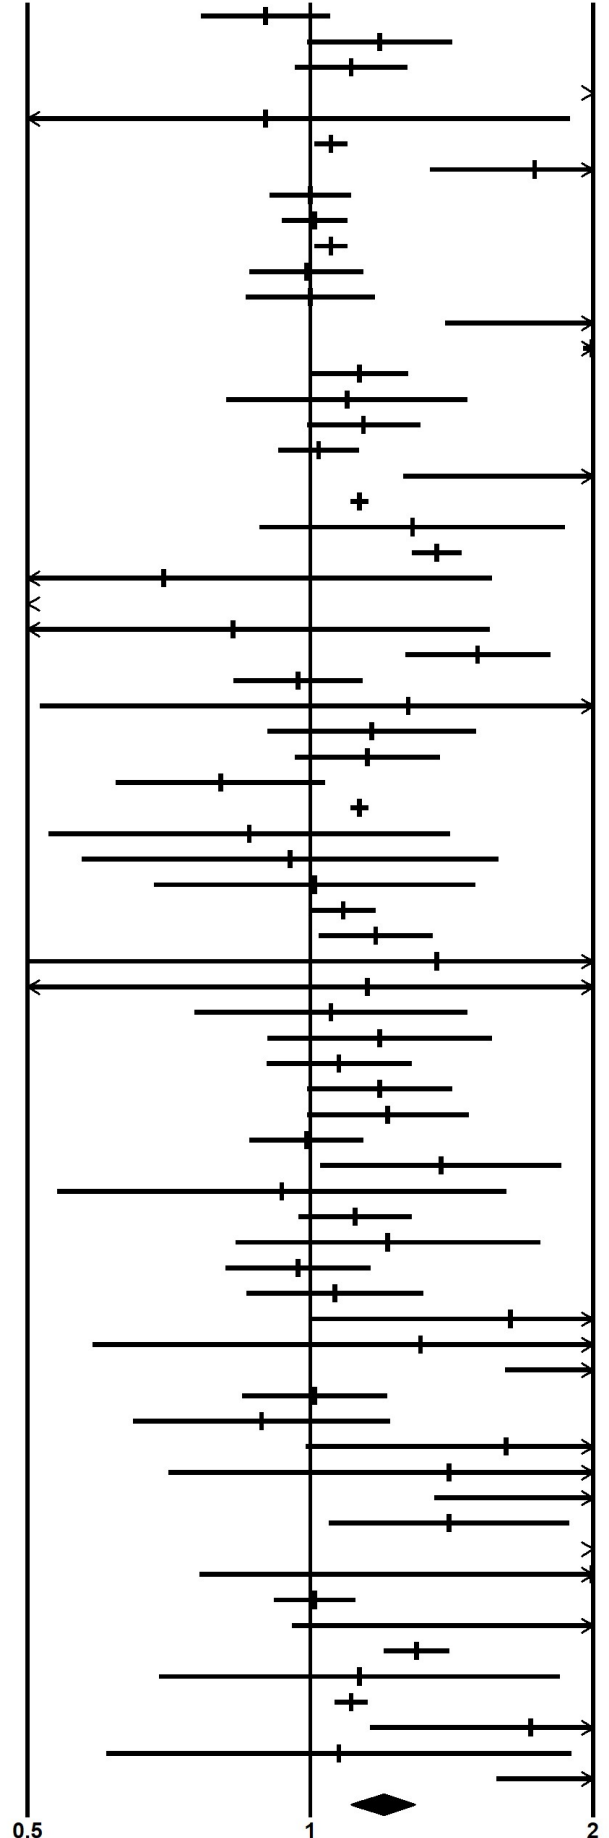

(A)

medRxiv preprint doi: <https://doi.org/10.1101/2023.05.13.23289893>; this version posted May 15, 2023. The copyright holder for this preprint (which was not certified by peer review) is the author/funder, who has granted medRxiv a license to display the preprint in perpetuity. All rights reserved. No reuse allowed without permission.

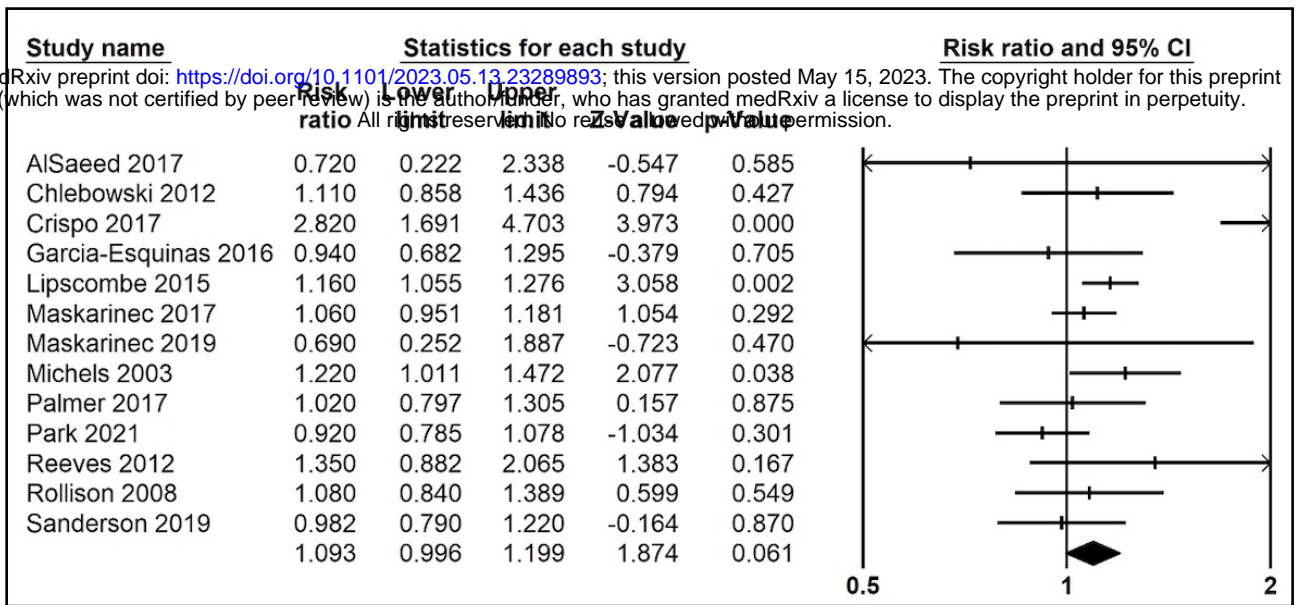

(B)

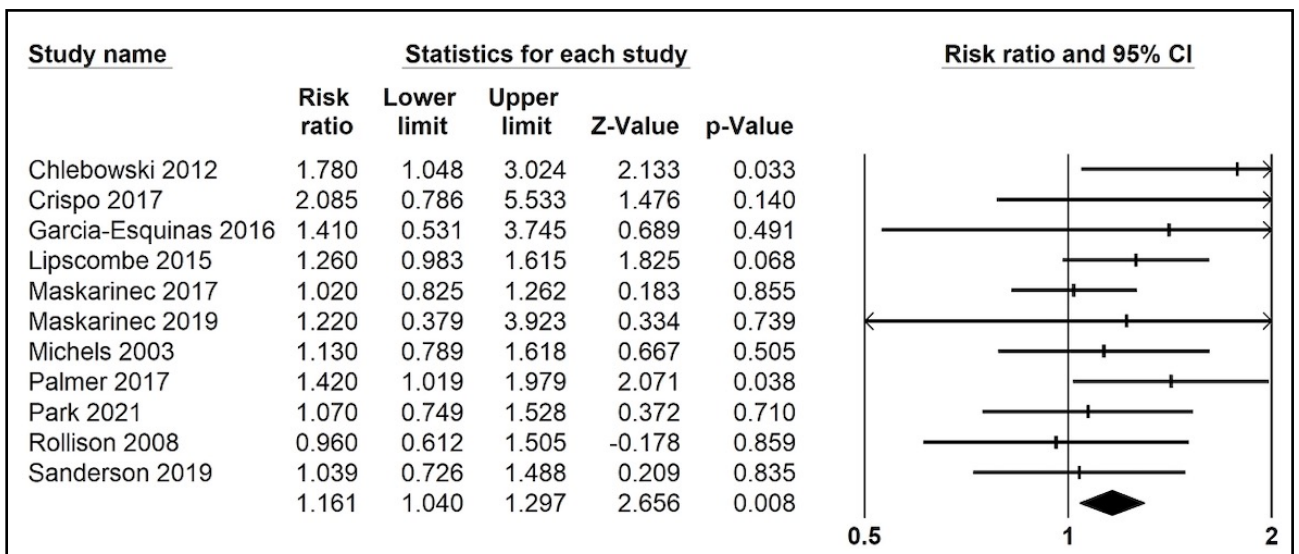

(C)

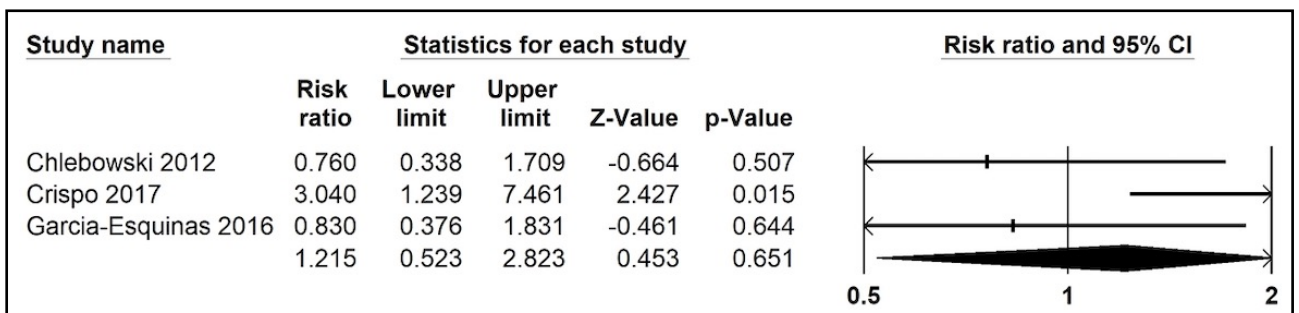

(D)

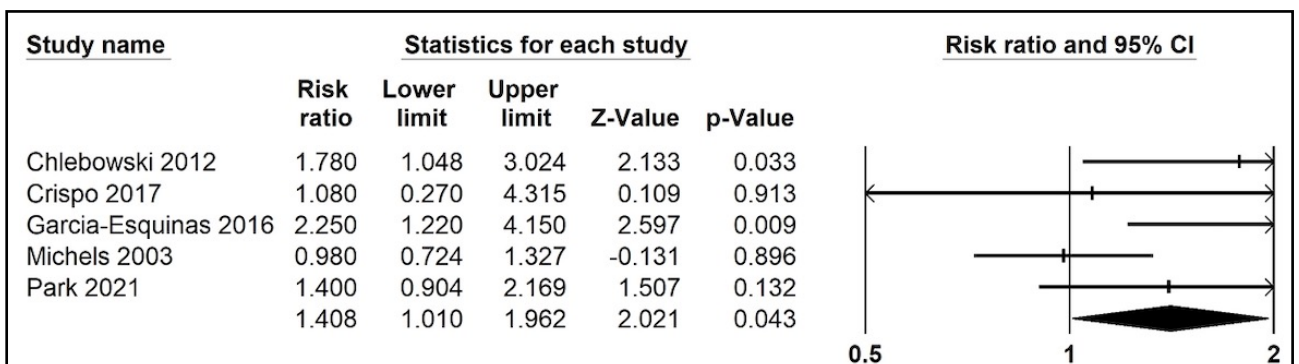

TABLE 1. Characteristics of studies included in the systematic review

| Study ID                      | Study design | Country of study | N participants | Age (years) | Time frame or follow-up      | DM identification | BCa identification | Adjusted for BMI | Quality |
|-------------------------------|--------------|------------------|----------------|-------------|------------------------------|-------------------|--------------------|------------------|---------|
| Omara 1985 <sup>1</sup>       | Case-control | US               | 9,165          | 30-89       | 1957-1965                    | Medical records   | Medical records    | No               | Medium  |
| Bergkvist 1988 <sup>2</sup>   | Case-control | Sweden           | 1,975          | ≥35         | 1977-1980                    | Self-report       | Medical records    | No               | Low     |
| Adami 1991 <sup>3</sup>       | Cohort       | Sweden           | 27,862         | ≥20         | Mean 5.2 years <sup>†</sup>  | Medical records   | Medical records    | No               | Low     |
| Lavecchia 1994 <sup>4</sup>   | Case-control | Italy            | 8,116          | <75         | 1983-1985                    | Self-report       | Medical records    | No               | Medium  |
| Steenland 1995 <sup>5</sup>   | Cohort       | US               | 7,204          | 25-74       | Mean 7.7 years               | Self-report       | Medical records    | Yes              | Low     |
| Goodman 1997 <sup>6</sup>     | Cohort       | Japan            | 22,200         | NA          | Mean 8.3 years               | Self-report       | Medical records    | No               | Low     |
| Hjalgrim 1997 <sup>7</sup>    | Cohort       | Denmark          | 402            | NA          | Mean 10.1 years <sup>†</sup> | Medical records   | Medical records    | No               | Medium  |
| Talamini 1997 <sup>8</sup>    | Case-control | Italy            | 5,157          | Median 55   | 1991-1994                    | Self-report       | Medical records    | Yes              | High    |
| Wideroff 1997 <sup>9</sup>    | Cohort       | Denmark          | 55,010         | Median 69   | 1977-1993                    | Medical records   | Medical records    | No               | Medium  |
| Weiderpass 1997 <sup>10</sup> | Cohort       | Sweden           | 80,005         | Mean 64.2   | Mean 6.7 years               | Medical records   | Medical records    | No               | Low     |
| Weiss 1999 <sup>11</sup>      | Case-control | US               | 4,163          | 20-54       | 1990-1992                    | Self-report       | Medical records    | Yes              | Medium  |
| Baron 2001 <sup>12</sup>      | Case-control | US               | 17,515         | 50-75       | 1990-1994                    | Self-report       | Medical records    | Yes              | Medium  |
| Michels 2003 <sup>13</sup>    | Cohort       | US               | 116,488        | 30 –55      | Mean 20.3                    | Medical           | Self-report        | Yes              | Medium  |

| Study ID                     | Study design | Country of study | N participants | Age (years) | Time frame or follow-up      | DM identification              | BCa identification | Adjusted for BMI | Quality |
|------------------------------|--------------|------------------|----------------|-------------|------------------------------|--------------------------------|--------------------|------------------|---------|
| Jee 2005 <sup>14</sup>       | Cohort       | South Korea      | 468,615        | Mean 49.6   | Up to 10 years               | Self-report or Medical records | Medical records    | No               | Medium  |
| Khan 2006 <sup>15</sup>      | Cohort       | Japan            | 33,503         | 40-79       | Mean 8.0 years <sup>†</sup>  | Self-report                    | Medical records    | Yes              | Medium  |
| Inoue 2006 <sup>16</sup>     | Cohort       | Japan            | 51,223         | Mean 51.8   | 1990-2003                    | Self-report                    | Medical records    | Yes              | Medium  |
| Rapp 2006 <sup>17</sup>      | Cohort       | Austria          | 77,228         | Mean 43     | Mean 8.6 years               | Medical records                | Medical records    | Yes              | High    |
| Wu 2007 <sup>18</sup>        | Case-control | US               | 2,396          | 25-74       | 1995-2001                    | Self-report                    | Medical records    | Yes              | High    |
| Sellers 2007 <sup>19</sup>   | Cohort       | US               | 6,130          | >18         | Mean 40.2 years <sup>†</sup> | Self-report                    | Self-report        | Yes              | Low     |
| Beji 2007 <sup>20</sup>      | Case-control | Turkish          | 1,455          | Median 56   | 2002-2003                    | Self-report                    | Medical records    | Yes              | Low     |
| Kuriki 2007 <sup>21</sup>    | Case-control | Japan            | 39,900         | 40–80       | Starting 1988                | Self-report                    | Medical records    | Yes              | Medium  |
| Rollison 2008 <sup>22</sup>  | Case-control | US               | 4,847          | Mean 55.7   | 1999-2004                    | Self-report                    | Medical records    | Yes              | Medium  |
| Ogunleye 2009 <sup>23</sup>  | Cohort       | UK               | 13,416         | Mean 62     | 1993-2004                    | Medical records                | Medical records    | No               | Medium  |
| Sanderson 2010 <sup>24</sup> | Case-control | Mexico           | 1,169          | 30-79       | 2003-2008                    | Medical records                | Medical records    | No               | Medium  |
| Chodick 2010 <sup>25</sup>   | Cohort       | Israel           | 47,682         | Mean 62     | Mean 8 years                 | Medical records                | Medical records    | Yes              | Medium  |

| Study ID                      | Study design | Country of study      | N participants | Age (years) | Time frame or follow-up     | DM identification | BCa identification | Adjusted for BMI | Quality |
|-------------------------------|--------------|-----------------------|----------------|-------------|-----------------------------|-------------------|--------------------|------------------|---------|
| Hemminki 2010 <sup>26</sup>   | Cohort       | Sweden                | 62,563         | >39         | Median 15 years             | Medical records   | Medical records    | No               | Medium  |
| Bowker 2011 <sup>27</sup>     | Cohort       | Canada                | 169,012        | Mean 61.8   | Mean 4.4 years              | Medical records   | Medical records    | No               | Medium  |
| Lambe 2011 <sup>28</sup>      | Cohort       | Sweden                | 230,737        | Mean 46.6   | Mean 11.7 years             | Medical records   | Medical records    | No               | Medium  |
| Ronco 2012 <sup>29</sup>      | Case-control | Uruguay               | 750            | >18         | 2004-2010                   | Self-report       | Medical records    | No               | Medium  |
| Ronco 2012 <sup>30</sup>      | Case-control | Uruguay               | 912            | 23-69       | 2004-2009                   | Self-report       | Medical records    | Yes              | Medium  |
| Reeves 2012 <sup>31</sup>     | Cohort       | US                    | 8,956          | >65         | 1986-2009                   | Self-report       | Medical records    | Yes              | Medium  |
| Yeh 2012 <sup>32</sup>        | Cohort       | US                    | 10,467         | ≥30         | 1989-2006                   | Self-report       | Medical records    | Yes              | Medium  |
| Chlebowski 2012 <sup>33</sup> | Cohort       | US                    | 68,019         | 63.9        | Mean 11.8 years             | Self-report       | Medical records    | Yes              | High    |
| Zhang 2012 <sup>34</sup>      | Cohort       | China                 | 4,155          | Mean 61.1   | Mean 9.1 years <sup>†</sup> | Medical records   | Medical records    | No               | Low     |
| Magliano 2012 <sup>35</sup>   | Cohort       | Australia             | 3,315          | ≥45         | Mean 11.0 years             | Medical records   | Medical records    | No               | Low     |
| Bosetti 2012 <sup>36</sup>    | Case-control | Italy and Switzerland | 6,426          | Median 50   | 1991-2009                   | Self-report       | Medical records    | Yes              | Medium  |
| Attner 2012 <sup>37</sup>     | Case-control | Sweden                | 23,566         | 45-84       | Up to 10 years              | Medical records   | Medical records    | No               | Medium  |
| Redaniel                      | Cohort       | UK                    | 82,867         | >35         | 1987-2007                   | Medical           | Medical            | Yes              | High    |

| Study ID                            | Study design                 | Country of study | N participants | Age (years)     | Time frame or follow-up      | DM identification              | BCa identification | Adjusted for BMI | Quality |
|-------------------------------------|------------------------------|------------------|----------------|-----------------|------------------------------|--------------------------------|--------------------|------------------|---------|
| 2012 <sup>38</sup>                  |                              |                  |                |                 |                              | records                        | records            |                  |         |
| Carstensen 2012 <sup>39</sup>       | Cohort                       | Danish           | 260,804        | 65-75           | 1995-2009                    | Medical records                | Medical records    | No               | Medium  |
| Wang 2013 <sup>40</sup>             | Case-control                 | China            | 492            | Mean 49.9       | In 2008                      | Self-report                    | Self-report        | Yes              | Medium  |
| Jung 2013 <sup>41</sup>             | Case-control                 | South Korea      | 5,060          | Mean 48         | 2001-2007                    | Self-report                    | Medical records    | No               | Low     |
| Nakamura 2013 <sup>42</sup>         | Cohort                       | Japan            | 16,547         | >35             | Mean 14.0 years <sup>†</sup> | Self-report                    | Medical records    | Yes              | Medium  |
| Mourouti 2013 <sup>43</sup>         | Case-control                 | Greece           | 500            | Mean 56         | 2010-2012                    | Medical records                | Medical records    | Yes              | Medium  |
| Salinas-Martínez 2014 <sup>44</sup> | Case-control                 | Mexico           | 646            | NA <sup>§</sup> | 2011-2013                    | Self-report or Medical records | Medical records    | No               | Low     |
| Onitilo 2014 <sup>45</sup>          | Cohort                       | US               | 31,769         | >30             | 1995-2009                    | Medical records                | Medical records    | Yes              | Medium  |
| Hsieh 2014 <sup>46</sup>            | Cohort                       | China            | 18,563         | >20             | 2000-2010                    | Medical records                | Medical records    | Yes              | Low     |
| Lipscombe 2015 <sup>47</sup>        | cross-sectional <sup>‡</sup> | Canada           | 38,407         | 20–105          | 2007-2012                    | Medical records                | Medical records    | No               |         |
| Wang 2015 <sup>48</sup>             | Case-control                 | China            | 129            | Mean 53         | 2011-2013                    | Medical records                | Self-report        | No               | Medium  |
| Wang 2015 <sup>49</sup>             | Cohort                       | China            | 163,449        | 59.4            | 2007-2013                    | Medical records                | Medical records    | No               | Medium  |
| Liaw 2015 <sup>50</sup>             | Cohort                       | China            | 10,827,079     | Mean 60.2       | 2004-2010                    | Medical records                | Medical records    | No               | Medium  |



| Study ID                           | Study design                 | Country of study | N participants | Age (years)     | Time frame or follow-up      | DM identification              | BCa identification | Adjusted for BMI | Quality |
|------------------------------------|------------------------------|------------------|----------------|-----------------|------------------------------|--------------------------------|--------------------|------------------|---------|
| Harding 2015 <sup>51</sup>         | Cohort                       | Australia        | 408,426        | Median 60.4     | Median 5.8 years             | Medical records                | Medical records    | Yes              | Medium  |
| Gong 2016 <sup>52</sup>            | Cohort                       | US               | 145,826        | 50-79           | 1993-2015                    | Self-report                    | Medical records    | Yes              | High    |
| Tabassum 2016 <sup>53</sup>        | Case-control                 | Pakistan         | 400            | 30-70           | 2014-2015                    | Self-report                    | Medical records    | No               | Low     |
| Dankner 2016 <sup>54</sup>         | Cohort                       | Israel           | 1,152,122      | 21-89           | 2002-2012                    | Medical records                | Medical records    | No               | Medium  |
| Garcia-Esquinas 2016 <sup>55</sup> | Case-control                 | Spanish          | 2010           | 20-85           | 2008-2013                    | Self-report                    | Medical records    | Yes              | Medium  |
| Gini 2016 <sup>56</sup>            | Cohort                       | Italy            | 14,420         | 40-84           | Median 3.7 years             | Medical records                | Medical records    | No               | Medium  |
| Palmer 2017 <sup>57</sup>          | Cohort                       | US               | 54,337         | 21-69           | Mean 15.6 years <sup>†</sup> | Self-report                    | Self-report        | Yes              | Medium  |
| Maskarinec 2017 <sup>58</sup>      | Cohort                       | US               | 103,721        | 45-75           | Mean 14.8 years <sup>†</sup> | Self-report                    | Medical records    | Yes              | Medium  |
| AlSaeed 2017 <sup>59</sup>         | cross-sectional <sup>‡</sup> | Saudi Arabia     | 110            | Mean 47         | 2000-2006                    | Medical records                | Medical records    | Yes              | Medium  |
| Crispo 2017 <sup>60</sup>          | Case-control                 | Italy            | 1,149          | NA <sup>§</sup> | 2009-2013                    | Self-report or Medical records | Medical records    | Yes              | Medium  |
| Bronsveld 2017 <sup>61</sup>       | Cohort                       | UK               | 295,996        | Median 64       | Mean 5.3 years <sup>†</sup>  | Medical records                | Medical records    | No               | Low     |
| Fang 2018 <sup>62</sup>            | Cohort                       | China            | 27,200         | Mean 60         | Mean 6.65 years              | Medical records                | Medical records    | No               | Medium  |

| Study ID                        | Study design | Country of study | N participants | Age (years)     | Time frame or follow-up     | DM identification | BCa identification | Adjusted for BMI | Quality |
|---------------------------------|--------------|------------------|----------------|-----------------|-----------------------------|-------------------|--------------------|------------------|---------|
| Pan 2018 <sup>63</sup>          | Cohort       | China            | 300,060        | 30-79           | 2004-2013                   | Medical records   | Medical records    | Yes              | High    |
| He 2018 <sup>64</sup>           | Cohort       | China            | 379,521        | ≥18             | 2009-2014                   | Medical records   | Medical records    | No               | Low     |
| Rastad 2019 <sup>65</sup>       | Cohort       | US               | 7,630          | 45-64           | 1990-1998                   | Medical records   | Self-report        | Yes              | Medium  |
| Sanderson 2019 <sup>66</sup>    | Cohort       | US               | 25,366         | 40-49           | Mean 7.0 years <sup>†</sup> | Self-report       | Medical records    | Yes              | Medium  |
| Maskarinec 2019 <sup>67</sup>   | Cohort       | Japan            | 29,818         | 50.9            | Mean 27.6 years             | Self-report       | Medical records    | Yes              | Medium  |
| Vatseba 2019 <sup>68</sup>      | Cohort       | Ivano-Frankivsk  | 395,767        | NA <sup>§</sup> | 2012-2017                   | Medical records   | Medical records    | No               | Low     |
| Maskarinec 2019 <sup>69</sup>   | Cohort       | Iceland          | 9,606          | Mean 53.2       | Mean 28.4 years             | Medical records   | Medical records    | Yes              | High    |
| Rennert 2020 <sup>70</sup>      | Case-control | Israel           | 10164          | 62.2            | Starting 1998               | Medical records   | Medical records    | No               | Medium  |
| Bjornsdottir 2020 <sup>71</sup> | Cohort       | Sweden           | 1248114        | 65.2            | Median 6.6 years            | Medical records   | Medical records    | No               | Medium  |
| Park 2021 <sup>72</sup>         | Cohort       | US               | 44541          | 35-74           | Median 8.6 years            | Medical records   | Medical records    | Yes              | High    |

BMI, body mass index; DM, diabetes mellitus; NA, not available; UK, the United Kingdom; US, the United States.

<sup>†</sup>If the cohort study did not provide the mean or median length of follow-up, the mean follow-up length was calculated by dividing the total length of follow-up years by the number of participants.

<sup>‡</sup>Lipscombe 2015 and AISaeed 2017 studied the molecular expression of breast cancer at cancer diagnosis. The risk of bias of these two studies was not assessed due to their cross-sectional design.

<sup>§</sup>Unreported.

TABLE 2. Summary estimates of the associations between diabetes and breast cancer risk across subgroups defined by study quality, study design, study region, diabetes ascertainment, adjustment for BMI, year of publication, and menopausal status.

| Subgroup              | N studies | Summary estimate | 95% CI    | I <sup>2</sup> | P      |
|-----------------------|-----------|------------------|-----------|----------------|--------|
| All studies           | 70        | 1.20             | 1.11-1.29 | 97.9%          | <0.001 |
| Study quality         |           |                  |           |                |        |
| High                  | 9         | 1.12             | 1.02-1.22 | 53.0%          | 0.03   |
| Medium                | 45        | 1.15             | 1.05-1.27 | 98.4%          | <0.001 |
| Low                   | 16        | 1.42             | 1.08-1.86 | 96.6%          | <0.001 |
| Study design          |           |                  |           |                |        |
| Cohort                | 46        | 1.15             | 1.05-1.27 | 98.6%          | <0.001 |
| Case-control          | 24        | 1.26             | 1.13-1.40 | 73.1%          | <0.001 |
| Study region          |           |                  |           |                |        |
| Asia                  | 23        | 1.34             | 1.11-1.63 | 99.1%          | <0.001 |
| Americas              | 23        | 1.10             | 1.03-1.17 | 40.8%          | 0.02   |
| Europe                | 21        | 1.13             | 1.06-1.21 | 83.4%          | <0.001 |
| Australia             | 3         | 1.15             | 0.99-1.33 | 32.0%          | 0.23   |
| Year of publication   |           |                  |           |                |        |
| Before 2012           | 28        | 1.18             | 1.09-1.26 | 77.6%          | <0.001 |
| In/after 2012         | 42        | 1.20             | 1.08-1.33 | 98.7%          | <0.001 |
| DM ascertainment      |           |                  |           |                |        |
| Self-report           | 30        | 1.18             | 1.09-1.29 | 62.0%          | <0.001 |
| Medical records       | 37        | 1.14             | 1.03-1.26 | 98.9%          | <0.001 |
| Both                  | 3         | 2.00             | 1.33-3.01 | 68.7%          | 0.04   |
| Adjustment for BMI    |           |                  |           |                |        |
| No                    | 31        | 1.21             | 1.08-1.35 | 98.9%          | <0.001 |
| Yes                   | 39        | 1.19             | 1.06-1.32 | 89.7%          | <0.001 |
| Adjustment for parity |           |                  |           |                |        |
| No                    | 56        | 1.15             | 1.06-1.26 | 98.3%          | <0.001 |

|                                |    |      |           |       |        |
|--------------------------------|----|------|-----------|-------|--------|
| Yes                            | 14 | 1.39 | 1.18-1.62 | 79.7% | <0.001 |
| Menopausal status <sup>†</sup> |    |      |           |       |        |
| Pre                            | 15 | 0.95 | 0.85-1.05 | 0.00% | 0.78   |
| Post                           | 31 | 1.12 | 1.07-1.17 | 65.5% | <0.001 |

Abbreviations: BMI, body mass index; CI, confidence interval; DM, diabetes mellitus.

<sup>†</sup>The numbers of studies in the subgroups defined by menopausal status do not sum up to 70 because only a subset of the studies assessed pre- and post-menopausal breast cancer separately.

## References

1. O'Mara BA, Byers T, Schoenfeld E. Diabetes mellitus and cancer risk: A multisite case-control study. *J Chronic Dis*. 1985;38(5):435-441. doi:10.1016/0021-9681(85)90139-0
2. Bergkvist L, Persson I, Adami HO, Schairer C. Risk Factors for Breast and Endometrial Cancer in a Cohort of Women Treated with Menopausal Oestrogens. *Int J Epidemiol*. 1988;17(4):732-737. doi:10.1093/ije/17.4.732
3. Adami HO, McLaughlin J, Ekblom A, et al. Cancer risk in patients with diabetes mellitus. *Cancer Causes Control*. 1991;2(5):307-314. doi:10.1007/BF00051670
4. La Vecchia C, Negri E, Franceschi S, D'Avanzo B, Boyle P. A case-control study of diabetes mellitus and cancer risk. *Br J Cancer*. 1994;70(5):950-953. doi:10.1038/bjc.1994.427
5. Steenland K, Nowlin S, Palu S. Cancer incidence in the National Health and Nutrition Survey I. Follow-up data: diabetes, cholesterol, pulse and physical activity. *Cancer Epidemiol Biomark Prev Publ Am Assoc Cancer Res Cosponsored Am Soc Prev Oncol*. 1995;4(8):807-811.
6. Goodman MT, Cologne JB, Moriwaki H, Vaeth M, Mabuchi K. Risk Factors for Primary Breast Cancer in Japan: 8-Year Follow-Up of Atomic Bomb Survivors. *Prev Med*. 1997;26(1):144-153. doi:10.1006/pmed.1996.9979
7. Hjalgrim H, Frisch M, Ekblom A, Kyvik KO, Melbye M, Green A. Cancer and diabetes - a follow-up study of two populationbased cohorts of diabetic patients. *J Intern Med*. 2007;241(6):471-475. doi:10.1111/j.1365-2796.1997.tb00004.x
8. Talamini R, Franceschi S, Favero A, Negri E, Parazzini F, La Vecchia C. Selected medical conditions and risk of breast cancer. *Br J Cancer*. 1997;75(11):1699-1703. doi:10.1038/bjc.1997.289
9. Wideroff L, Gridley G, Chow WH, et al. Cancer Incidence in a Population-Based Cohort of Patients Hospitalized With Diabetes Mellitus in Denmark. *JNCI J Natl Cancer Inst*. 1997;89(18):1360-1365. doi:10.1093/jnci/89.18.1360

10. Weiderpass E, Gridley G, Persson I, Nyrén O, Ekblom A, Adami HO. Risk of endometrial and breast cancer in patients with diabetes mellitus. *Int J Cancer*. 1997;71(3):360-363. doi:10.1002/(SICI)1097-0215(19970502)71:3<360::AID-IJC9>3.0.CO;2-W
11. Weiss HA, Brinton LA, Potischman NA, et al. Breast cancer risk in young women and history of selected medical conditions. *Int J Epidemiol*. 1999;28(5):816-823. doi:10.1093/ije/28.5.816
12. Baron JA, Weiderpass E, Newcomb PA, et al. Metabolic disorders and breast cancer risk (United States). :6.
13. Michels KB, Solomon CG, Hu FB, et al. Type 2 Diabetes and Subsequent Incidence of Breast Cancer in the Nurses' Health Study. *Diabetes Care*. 2003;26(6):1752-1758. doi:10.2337/diacare.26.6.1752
14. Jee SH, Ohrr H, Sull JW, Yun JE, Ji M, Samet JM. Fasting Serum Glucose Level and Cancer Risk in Korean Men and Women. :9.
15. Khan M, Mori M, Fujino Y, et al. Site-specific Cancer Risk Due to Diabetes Mellitus History: Evidence from the Japan Collaborative Cohort (JACC) Study. :8.
16. Inoue M. Diabetes Mellitus and the Risk of Cancer: Results From a Large-Scale Population-Based Cohort Study in Japan. *Arch Intern Med*. 2006;166(17):1871. doi:10.1001/archinte.166.17.1871
17. Rapp K, Schroeder J, Klenk J, et al. Fasting blood glucose and cancer risk in a cohort of more than 140,000 adults in Austria. *Diabetologia*. 2006;49(5):945-952. doi:10.1007/s00125-006-0207-6
18. Wu AH, Yu MC, Tseng CC, Stanczyk FZ, Pike MC. Diabetes and risk of breast cancer in Asian-American women. *Carcinogenesis*. 2007;28(7):1561-1566. doi:10.1093/carcin/bgm081
19. Sellers TA, Jensen LE, Vierkant RA, et al. Association of diabetes with mammographic breast density and breast cancer in the Minnesota breast cancer family study. *Cancer Causes Control*. 2007;18(5):505-515. doi:10.1007/s10552-007-0128-9
20. Beji NK, Reis N. Risk factors for breast cancer in Turkish women: a hospital-based case-control study. *Eur J Cancer Care (Engl)*. 2007;16(2):178-184. doi:10.1111/j.1365-2354.2006.00711.x

21. Kuriki K, Hirose K, Tajima K. Diabetes and cancer risk for all and specific sites among Japanese men and women. *Eur J Cancer Prev.* 2007;16(1):83-89. doi:10.1097/01.cej.0000228404.37858.40
22. Rollison DE, Giuliano AR, Sellers TA, et al. Population-based Case-Control Study of Diabetes and Breast Cancer Risk in Hispanic and Non-Hispanic White Women Living in US Southwestern States. *Am J Epidemiol.* 2008;167(4):447-456. doi:10.1093/aje/kwm322
23. Ogunleye AA, Ogston SA, Morris AD, Evans JMM. A cohort study of the risk of cancer associated with type 2 diabetes. *Br J Cancer.* 2009;101(7):1199-1201. doi:10.1038/sj.bjc.6605240
24. Sanderson M, Peltz G, Perez A, et al. Diabetes, physical activity and breast cancer among Hispanic women. *Cancer Epidemiol.* 2010;34(5):556-561. doi:10.1016/j.canep.2010.06.001
25. Chodick G, Heymann AD, Rosenmann L, et al. Diabetes and risk of incident cancer: a large population-based cohort study in Israel. *Cancer Causes Control.* 2010;21(6):879-887. doi:10.1007/s10552-010-9515-8
26. Hemminki K, Li X, Sundquist J, Sundquist K. Risk of Cancer Following Hospitalization for Type 2 Diabetes. *The Oncologist.* 2010;15(6):548-555. doi:10.1634/theoncologist.2009-0300
27. Bowker SL, Richardson K, Marra CA, Johnson JA. Risk of Breast Cancer After Onset of Type 2 Diabetes. *Diabetes Care.* 2011;34(12):2542-2544. doi:10.2337/dc11-1199
28. Lambe M, Wigertz A, Garmo H, Walldius G, Jungner I, Hammar N. Impaired glucose metabolism and diabetes and the risk of breast, endometrial, and ovarian cancer. *Cancer Causes Control.* 2011;22(8):1163-1171. doi:10.1007/s10552-011-9794-8
29. Ronco AL, Stefani ED, Deneo-Pellegrini H. Risk Factors for Premenopausal Breast Cancer: A Case-control Study in Uruguay. *Asian Pac J Cancer Prev.* 2012;13(6):2879-2886. doi:10.7314/APJCP.2012.13.6.2879
30. Ronco AL, Stefani ED, Deneo-Pellegrini H, Quarneti A. Diabetes, Overweight and Risk of Postmenopausal Breast Cancer: A Case-Control Study in Uruguay. *Asian Pac J Cancer Prev.* 2012;13(1):139-146. doi:10.7314/APJCP.2012.13.1.139

31. Reeves KW, McLaughlin V, Fredman L, Ensrud K, Cauley JA. Components of metabolic syndrome and risk of breast cancer by prognostic features in the study of osteoporotic fractures cohort. *Cancer Causes Control*. 2012;23(8):1241-1251. doi:10.1007/s10552-012-0002-2
32. Yeh HC, Platz EA, Wang NY, Visvanathan K, Helzlsouer KJ, Brancati FL. A Prospective Study of the Associations Between Treated Diabetes and Cancer Outcomes. *Diabetes Care*. 2012;35(1):113-118. doi:10.2337/dc11-0255
33. Chlebowski RT, McTiernan A, Wactawski-Wende J, et al. Diabetes, Metformin, and Breast Cancer in Postmenopausal Women. *J Clin Oncol*. 2012;30(23):2844-2852. doi:10.1200/JCO.2011.39.7505
34. Zhang PH, Chen ZW, Lv D, et al. Increased risk of cancer in patients with type 2 diabetes mellitus: A retrospective cohort study in China. *BMC Public Health*. 2012;12(1):567. doi:10.1186/1471-2458-12-567
35. Magliano DJ, Davis WA, Shaw JE, Bruce DG, Davis TME. Incidence and predictors of all-cause and site-specific cancer in type 2 diabetes: the Fremantle Diabetes Study. *Eur J Endocrinol*. 2012;167(4):589-599. doi:10.1530/EJE-12-0053
36. Bosetti C, Rosato V, Polesel J, et al. Diabetes Mellitus and Cancer Risk in a Network of Case-Control Studies. *Nutr Cancer*. 2012;64(5):643-651. doi:10.1080/01635581.2012.676141
37. Attner B, Landin-Olsson M, Lithman T, Noreen D, Olsson H. Cancer among patients with diabetes, obesity and abnormal blood lipids: a population-based register study in Sweden. *Cancer Causes Control*. 2012;23(5):769-777. doi:10.1007/s10552-012-9946-5
38. Redaniel MTM, Jeffreys M, May MT, Ben-Shlomo Y, Martin RM. Associations of type 2 diabetes and diabetes treatment with breast cancer risk and mortality: a population-based cohort study among British women. *Cancer Causes Control*. 2012;23(11):1785-1795. doi:10.1007/s10552-012-0057-0
39. Carstensen B, Witte DR, Friis S. Cancer occurrence in Danish diabetic patients: duration and insulin effects. *Diabetologia*. 2012;55(4):948-958. doi:10.1007/s00125-011-2381-4
40. Wang XL, Jia CX, Liu LY, Zhang Q, Li YY, Li L. Obesity, diabetes mellitus, and the risk of female breast cancer in Eastern China. *World J Surg Oncol*. 2013;11(1):71. doi:10.1186/1477-7819-11-71



41. Jung SJ, Song M, Choi JY, et al. Association of Selected Medical Conditions With Breast Cancer Risk in Korea. *J Prev Med Pub Health*. 2013;46(6):346-352. doi:10.3961/jpmph.2013.46.6.346
42. Nakamura K, Wada K, Tamai Y, et al. Diabetes mellitus and risk of cancer in Takayama: A population-based prospective cohort study in Japan. *Cancer Sci*. 2013;104(10):1362-1367. doi:10.1111/cas.12235
43. Mourouti N, Papavagelis C, Kontogianni MD, et al. Cardiometabolic Factors and Breast Cancer: A Case-Control Study in Women. *Open Hypertens J*. 2013;5(1):49-49. doi:10.2174/1876526201305010049
44. Salinas-Martínez AM, Flores-Cortés LI, Cardona-Chavarría JM, et al. Prediabetes, Diabetes, and Risk of Breast Cancer: A Case-Control Study. *Arch Med Res*. 2014;45(5):432-438. doi:10.1016/j.arcmed.2014.06.004
45. Onitilo AA, Stankowski RV, Berg RL, et al. Breast cancer incidence before and after diagnosis of type 2 diabetes mellitus in women: increased risk in the prediabetes phase. *Eur J Cancer Prev*. 2014;23(2):76-83. doi:10.1097/CEJ.0b013e32836162aa
46. Hsieh SH, Chiou WK, Wang MH, Lin JD. Association of Body Weight With the Risk for Malignancies in Hospitalized Patients With or Without Diabetes Mellitus in Taiwan. *J Investig Med*. 2014;62(1):37-42. doi:10.2310/JIM.0000000000000004
47. Lipscombe LL, Fischer HD, Austin PC, et al. The association between diabetes and breast cancer stage at diagnosis: a population-based study. *Breast Cancer Res Treat*. 2015;150(3):613-620. doi:10.1007/s10549-015-3323-5
48. Wang M, Cheng N, Zheng S, et al. Metabolic syndrome and the risk of breast cancer among postmenopausal women in north-west China. *Climacteric*. 2015;18(6):852-858. doi:10.3109/13697137.2015.1071346
49. Wang M, Hu RY, Wu HB, et al. Cancer risk among patients with type 2 diabetes mellitus: a population-based prospective study in China. *Sci Rep*. 2015;5(1):11503. doi:10.1038/srep11503
50. Liaw YP, Ko PC, Jan SR, et al. Implications of Type1/2 Diabetes Mellitus in Breast Cancer Development: A General Female Population-based Cohort Study. *J Cancer*. 2015;6(8):734-739. doi:10.7150/jca.12197
51. Harding JL, Shaw JE, Peeters A, Cartensen B, Magliano DJ. Cancer Risk Among People With Type 1 and Type 2 Diabetes: Disentangling True Associations, Detection Bias, and Reverse Causation. *Diabetes Care*. 2015;38(2):264-270. doi:10.2337/dc14-1996

52. Gong Z, Aragaki AK, Chlebowski RT, et al. Diabetes, metformin and incidence of and death from invasive cancer in postmenopausal women: Results from the women's health initiative: Diabetes, Metformin and Incidence and Death from Invasive Cancer. *Int J Cancer*. 2016;138(8):1915-1927. doi:10.1002/ijc.29944
53. Tabassum I, Mahmood H, Faheem M. Type 2 Diabetes Mellitus as a Risk Factor for Female Breast Cancer in the Population of Northern Pakistan. :4.
54. Dankner R, Boffetta P, Balicer RD, et al. Time-Dependent Risk of Cancer After a Diabetes Diagnosis in a Cohort of 2.3 Million Adults. *Am J Epidemiol*. 2016;183(12):1098-1106. doi:10.1093/aje/kwv290
55. García-Esquinas E, Guinó E, Castaño-Vinyals G, et al. Association of diabetes and diabetes treatment with incidence of breast cancer. *Acta Diabetol*. 2016;53(1):99-107. doi:10.1007/s00592-015-0756-6
56. Gini A, Bidoli E, Zanier L, et al. Cancer among patients with type 2 diabetes mellitus: A population-based cohort study in northeastern Italy. *Cancer Epidemiol*. 2016;41:80-87. doi:10.1016/j.canep.2016.01.011
57. Palmer JR, Castro-Webb N, Bertrand K, Bethea TN, Denis GV. Type II Diabetes and Incidence of Estrogen Receptor Negative Breast Cancer in African American Women. *Cancer Res*. 2017;77(22):6462-6469. doi:10.1158/0008-5472.CAN-17-1903
58. Maskarinec G, Jacobs S, Park SY, et al. Type II Diabetes, Obesity, and Breast Cancer Risk: The Multiethnic Cohort. *Cancer Epidemiol Biomarkers Prev*. 2017;26(6):854-861. doi:10.1158/1055-9965.EPI-16-0789
59. Alsaeed E, Albeeshi M, Alsari M, Alowaini F, Alsaawi A, Bahabri I. Obesity do not Affect Tumor Expression of Estrogen and. *KUWAIT Med J*. Published online 2017:5.
60. Crispo A, Augustin LSA, Grimaldi M, et al. Risk Differences Between Prediabetes And Diabetes According To Breast Cancer Molecular Subtypes: DIABETES AND RISK OF BREAST CANCER SUBTYPES. *J Cell Physiol*. 2017;232(5):1144-1150. doi:10.1002/jcp.25579
61. Bronsveld HK, Peeters PJHL, de Groot MCH, de Boer A, Schmidt MK, De Bruin ML. Trends in breast cancer incidence among women with type-2 diabetes in British general practice. *Prim Care Diabetes*. 2017;11(4):373-382. doi:10.1016/j.pcd.2017.02.001

62. Fang Y, Zhang X, Xu H, et al. Cancer risk in Chinese diabetes patients: a retrospective cohort study based on management data. *Endocr Connect*. 2018;7(12):1415-1423. doi:10.1530/EC-18-0381
63. Pan XF, He M, Yu C, et al. Type 2 Diabetes and Risk of Incident Cancer in China: A Prospective Study Among 0.5 Million Chinese Adults. *Am J Epidemiol*.:12.
64. He X, Shi L, Wu J. Retrospective database analysis of cancer risk in patients with type 2 diabetes mellitus in China. *Curr Med Res Opin*. 2018;34(6):1089-1098. doi:10.1080/03007995.2017.1421527
65. Rastad H, Parsaeian M, Shirzad N, Mansournia MA, Yazdani K. Diabetes mellitus and cancer incidence: the Atherosclerosis Risk in Communities (ARIC) cohort study. *J Diabetes Metab Disord*. 2019;18(1):65-72. doi:10.1007/s40200-019-00391-5
66. Sanderson M, Lipworth L, Shrubsole MJ, et al. Diabetes, obesity, and subsequent risk of postmenopausal breast cancer among white and black women in the Southern Community Cohort Study. *Cancer Causes Control*. 2019;30(5):425-433. doi:10.1007/s10552-019-01164-4
67. Maskarinec G, Sadakane A, Sugiyama H, Brenner A, Tatsukawa Y, Grant E. Type 2 diabetes, obesity, and breast cancer risk among Japanese women of the atomic bomb survivor cohort. *Cancer Epidemiol*. 2019;60:179-184. doi:10.1016/j.canep.2019.04.009
68. Vatseba TS, Sokolova LK. BREAST CANCER IN WOMEN WITH DIABETES MELLITUS TYPE 2. *World Med Biol*. 2019;15(68):030. doi:10.26724/2079-8334-2019-2-68-30-34
69. Maskarinec G, Haraldsdóttir Á, Einarsdóttir K, et al. Type 2 diabetes and obesity in midlife and breast cancer risk in the Reykjavik cohort. *Cancer Causes Control*. 2019;30(10):1057-1065. doi:10.1007/s10552-019-01213-y
70. Rennert G, Rennert HS, Gronich N, Pinchev M, Gruber SB. Use of metformin and risk of breast and colorectal cancer. *Diabetes Res Clin Pract*. 2020;165:108232. doi:10.1016/j.diabres.2020.108232
71. Bjornsdottir HH, Rawshani A, Rawshani A, et al. OPEN A national observation study. *Sci Rep*.:13.
72. Park YMM, Bookwalter DB, O'Brien KM, Jackson CL, Weinberg CR, Sandler DP. A prospective study of type 2 diabetes, metformin use, and risk of breast cancer. *Ann Oncol*. 2021;32(3):351-359. doi:10.1016/j.annonc.2020.12.008
