# Supplementary material for: Diabetes and Incidence of Breast Cancer and its Molecular Subtypes: A Systematic Review and Meta-Analysis
Source: bioRxiv or medRxiv preprint supplement (doi:10.1101/2023.05.13.23289893), 2023-05-15
Supplement: Supplementary file [file media-2.pdf]

**Study name**

**Cumulative statistics**

**Cumulative risk ratio (95% CI)**

|                       | Point | Lower limit | Upper limit | Z-Value | p-Value |
|-----------------------|-------|-------------|-------------|---------|---------|
| Omara 1985            | 1.185 | 0.901       | 1.560       | 1.214   | 0.225   |
| Bergkvist 1988        | 1.146 | 0.886       | 1.483       | 1.039   | 0.299   |
| Adami 1991            | 0.986 | 0.804       | 1.209       | -0.137  | 0.891   |
| Lavecchia 1994        | 0.931 | 0.790       | 1.096       | -0.857  | 0.391   |
| Steenland 1995        | 0.952 | 0.807       | 1.124       | -0.575  | 0.565   |
| Goodman 1997          | 1.080 | 0.846       | 1.380       | 0.618   | 0.536   |
| Hjalgrim 1997         | 1.048 | 0.832       | 1.320       | 0.397   | 0.692   |
| Talamini 1997         | 1.101 | 0.883       | 1.374       | 0.855   | 0.393   |
| Weiderpass 1997       | 1.133 | 0.936       | 1.373       | 1.279   | 0.201   |
| Wideroff 1997         | 1.122 | 0.991       | 1.271       | 1.812   | 0.070   |
| Weiss 1999            | 1.122 | 0.996       | 1.264       | 1.887   | 0.059   |
| Baron 2001            | 1.119 | 1.009       | 1.241       | 2.127   | 0.033   |
| Michels 2003          | 1.125 | 1.027       | 1.233       | 2.526   | 0.012   |
| Jee 2005              | 1.158 | 1.055       | 1.271       | 3.076   | 0.002   |
| Inoue 2006            | 1.151 | 1.049       | 1.262       | 2.976   | 0.003   |
| Khan 2006             | 1.152 | 1.051       | 1.261       | 3.041   | 0.002   |
| Rapp 2006             | 1.163 | 1.065       | 1.270       | 3.353   | 0.001   |
| Beji 2007             | 1.200 | 1.087       | 1.325       | 3.625   | 0.000   |
| Kuriki 2007           | 1.197 | 1.090       | 1.315       | 3.751   | 0.000   |
| Sellers 2007          | 1.207 | 1.100       | 1.324       | 3.965   | 0.000   |
| Wu 2007               | 1.223 | 1.115       | 1.342       | 4.268   | 0.000   |
| Rollison 2008         | 1.211 | 1.109       | 1.323       | 4.263   | 0.000   |
| Ogunleye 2009         | 1.204 | 1.105       | 1.312       | 4.252   | 0.000   |
| Chodick 2010          | 1.188 | 1.095       | 1.289       | 4.141   | 0.000   |
| Hemminki 2010         | 1.202 | 1.110       | 1.302       | 4.529   | 0.000   |
| Sanderson 2010        | 1.190 | 1.102       | 1.286       | 4.430   | 0.000   |
| Bowker 2011           | 1.177 | 1.092       | 1.268       | 4.287   | 0.000   |
| Lambe 2011            | 1.175 | 1.094       | 1.262       | 4.412   | 0.000   |
| Attner 2012           | 1.175 | 1.097       | 1.259       | 4.578   | 0.000   |
| Bosetti 2012          | 1.192 | 1.112       | 1.278       | 4.949   | 0.000   |
| Carstensen 2012       | 1.180 | 1.107       | 1.257       | 5.104   | 0.000   |
| Chlebowski 2012       | 1.170 | 1.100       | 1.245       | 4.979   | 0.000   |
| Magliano 2012         | 1.166 | 1.096       | 1.240       | 4.890   | 0.000   |
| Redaniel 2012         | 1.163 | 1.096       | 1.234       | 4.988   | 0.000   |
| Reeves 2012           | 1.164 | 1.097       | 1.234       | 5.068   | 0.000   |
| Ronco post 2012       | 1.168 | 1.102       | 1.238       | 5.217   | 0.000   |
| Ronco pre 2012        | 1.169 | 1.103       | 1.239       | 5.259   | 0.000   |
| Yeh 2012              | 1.168 | 1.102       | 1.237       | 5.268   | 0.000   |
| Zhang 2012            | 1.184 | 1.116       | 1.256       | 5.602   | 0.000   |
| Jung 2013             | 1.175 | 1.109       | 1.245       | 5.462   | 0.000   |
| Mourouti 2013         | 1.176 | 1.110       | 1.246       | 5.495   | 0.000   |
| Nakamura 2013         | 1.175 | 1.110       | 1.245       | 5.512   | 0.000   |
| Wang 2013             | 1.178 | 1.112       | 1.247       | 5.579   | 0.000   |
| Hsieh 2014            | 1.158 | 1.067       | 1.258       | 3.511   | 0.000   |
| Onitilo 2014          | 1.155 | 1.066       | 1.252       | 3.524   | 0.000   |
| Salinas-Martínez 2014 | 1.171 | 1.080       | 1.269       | 3.840   | 0.000   |
| Harding 2015          | 1.154 | 1.081       | 1.232       | 4.283   | 0.000   |
| Liaw 2015             | 1.139 | 1.078       | 1.203       | 4.681   | 0.000   |
| Wang cc 2015          | 1.134 | 1.075       | 1.196       | 4.620   | 0.000   |
| Wang cs 2015          | 1.136 | 1.077       | 1.198       | 4.688   | 0.000   |
| Dankner 2016          | 1.201 | 1.091       | 1.321       | 3.733   | 0.000   |
| García-Esquinas 2016  | 1.198 | 1.090       | 1.317       | 3.735   | 0.000   |
| Gini 2016             | 1.197 | 1.090       | 1.314       | 3.763   | 0.000   |
| Gong 2016             | 1.192 | 1.087       | 1.307       | 3.736   | 0.000   |
| Tabassum 2016         | 1.201 | 1.096       | 1.317       | 3.923   | 0.000   |
| Bronsveld 2017        | 1.196 | 1.093       | 1.309       | 3.893   | 0.000   |
| Crispo 2017           | 1.207 | 1.103       | 1.320       | 4.107   | 0.000   |
| Maskarinec 2017       | 1.203 | 1.100       | 1.315       | 4.065   | 0.000   |
| Palmer 2017           | 1.203 | 1.101       | 1.313       | 4.107   | 0.000   |
| Fang 2018             | 1.201 | 1.101       | 1.309       | 4.130   | 0.000   |
| He 2018               | 1.202 | 1.103       | 1.310       | 4.189   | 0.000   |
| Pan 2018              | 1.202 | 1.104       | 1.309       | 4.237   | 0.000   |
| Maskarinec Ice 2019   | 1.199 | 1.102       | 1.304       | 4.210   | 0.000   |
| Maskarinec Ja 2019    | 1.196 | 1.101       | 1.299       | 4.224   | 0.000   |
| Rastad 2019           | 1.193 | 1.098       | 1.295       | 4.184   | 0.000   |
| Sanderson 2019        | 1.187 | 1.094       | 1.289       | 4.105   | 0.000   |
| Vatseba 2019          | 1.209 | 1.114       | 1.312       | 4.539   | 0.000   |
| Bjornsdottir 2020     | 1.204 | 1.112       | 1.304       | 4.583   | 0.000   |
| Rennert 2020          | 1.200 | 1.109       | 1.298       | 4.531   | 0.000   |
| Park 2021             | 1.195 | 1.106       | 1.292       | 4.489   | 0.000   |
|                       | 1.195 | 1.106       | 1.292       | 4.489   | 0.000   |

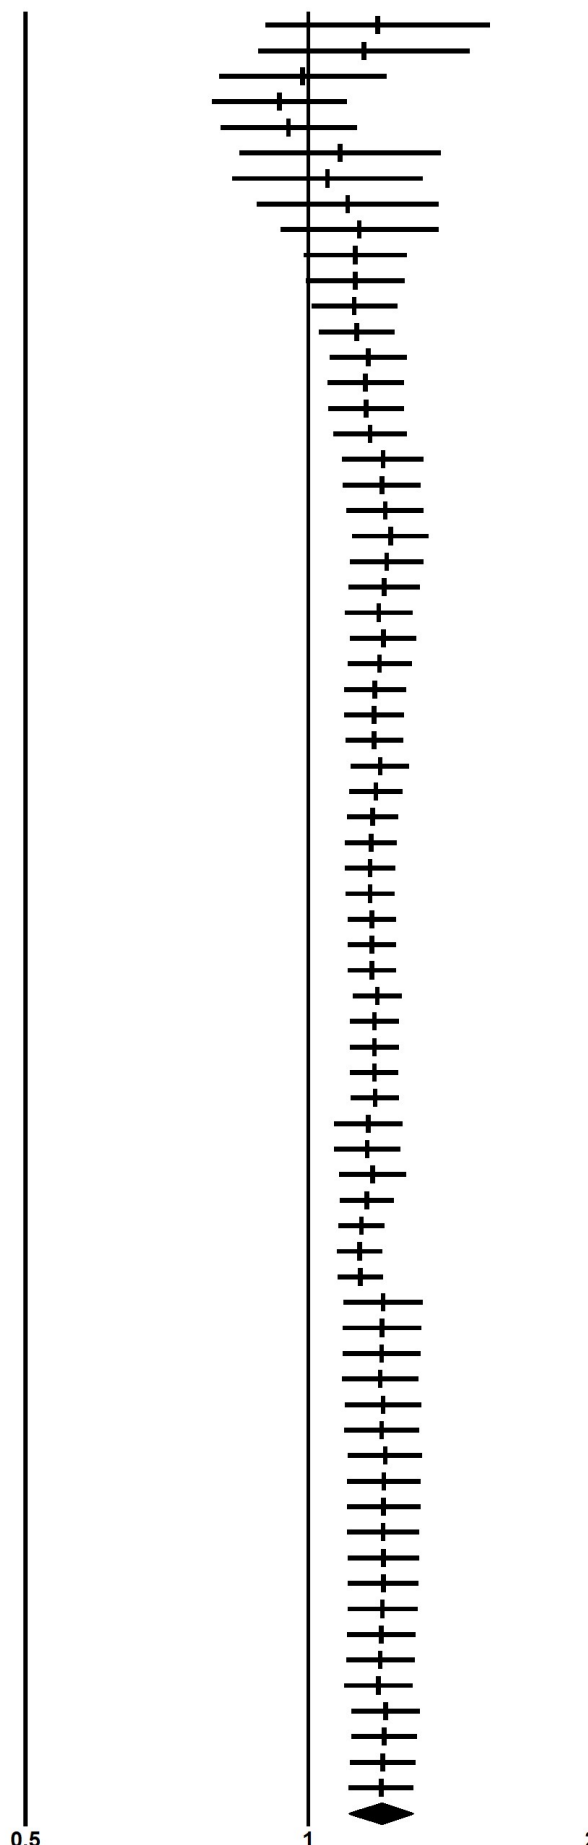

0.5

1

2
