# Supplementary material for: Diabetes and Incidence of Breast Cancer and its Molecular Subtypes: A Systematic Review and Meta-Analysis
Source: bioRxiv or medRxiv preprint supplement (doi:10.1101/2023.05.13.23289893), 2023-05-15

Funnel Plot of Standard Error by Log risk ratio

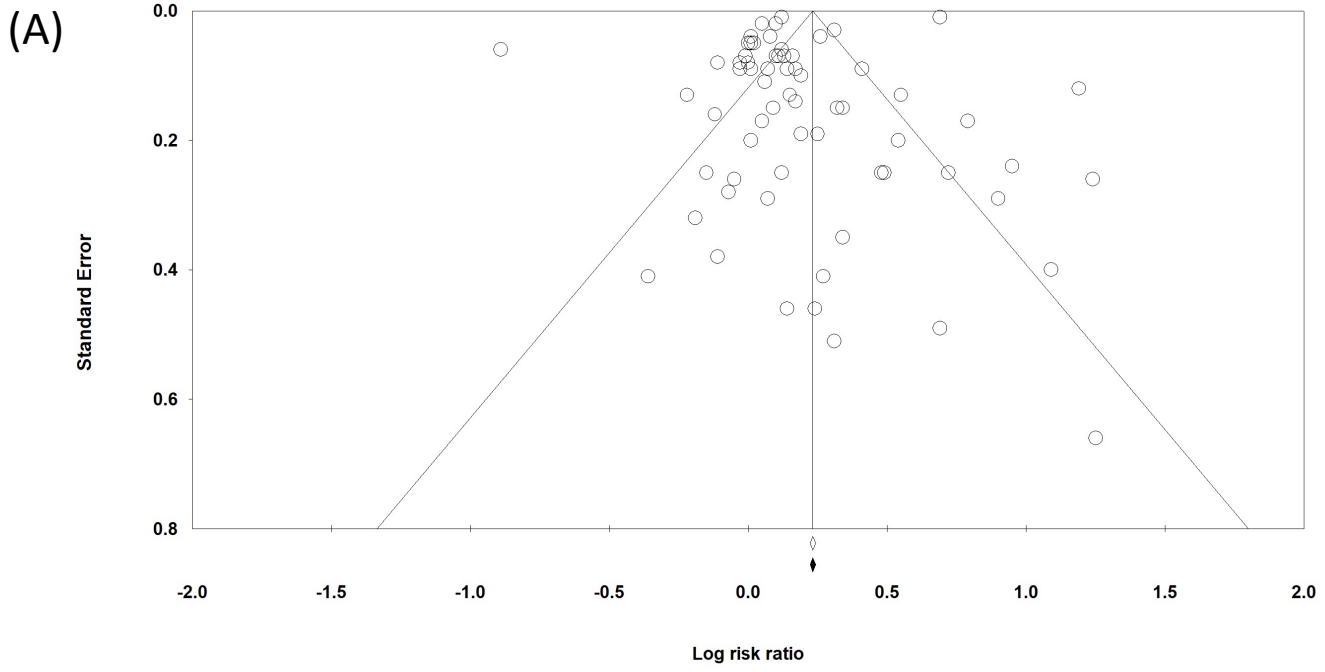

Funnel Plot of Standard Error by Log risk ratio

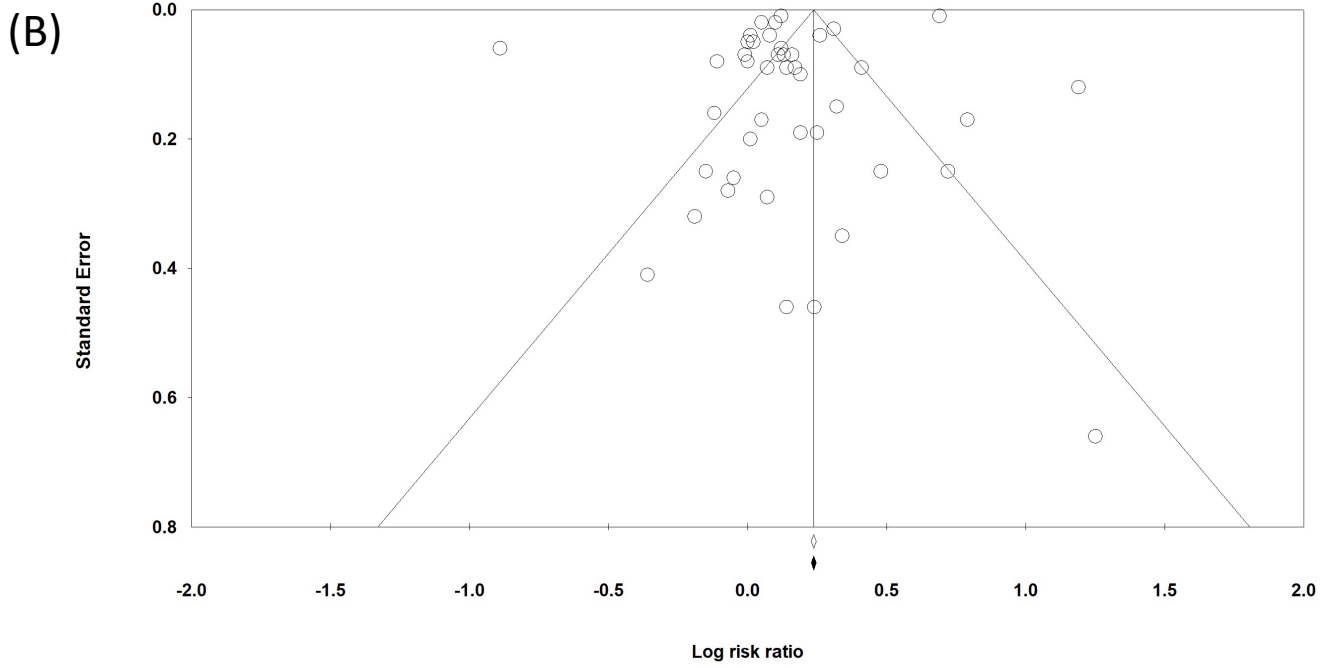

Funnel Plot of Standard Error by Log risk ratio

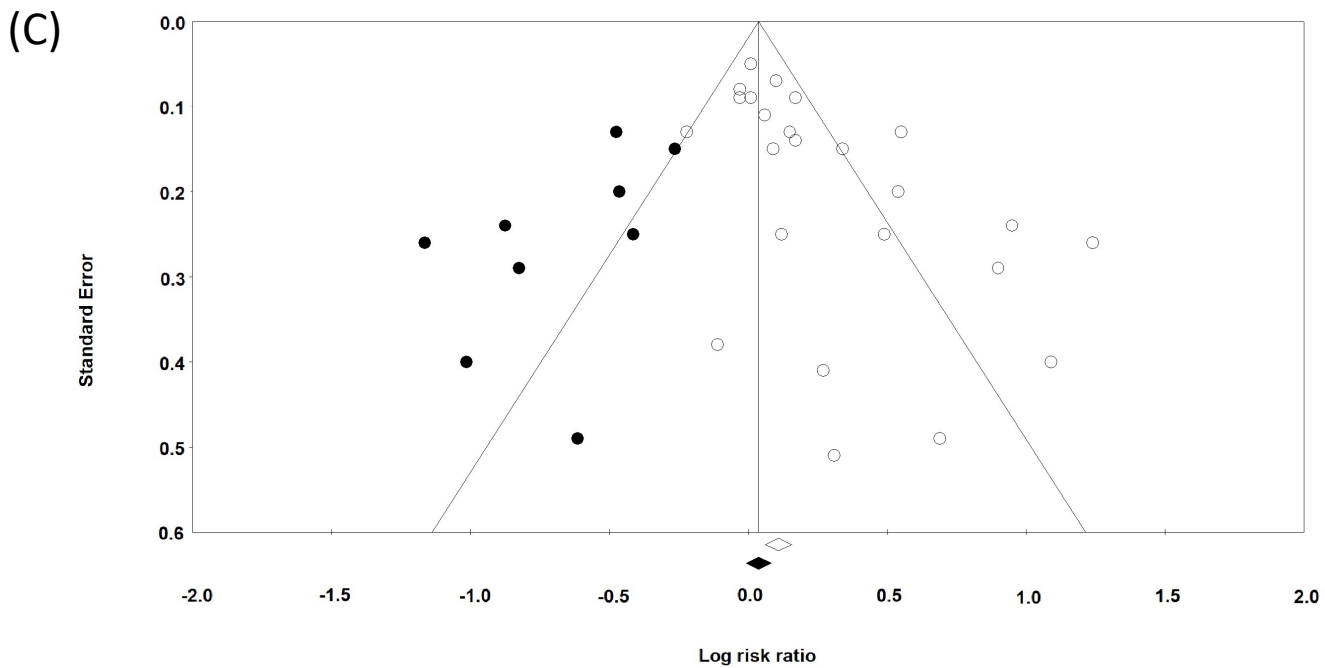

Supplement: Supplementary file [file media-3.pdf]
